# Supplementary material for: Sea level since the Last Glacial Maximum from the Atlantic coast of Africa
Source: Springer Nature journal article supplement (doi:10.1038/s41467-025-56721-0), 2025-02-10
Supplement: MOESM3 [file 41467_2025_56721_MOESM3_ESM.xlsx]

## Sheet: Figure 1
Figure 1c. Database of the sea-level datapoints. Please refer to Figure 1 for the region number. The type of sea-level data are as follow: SLIP is the Sea Level Index Point, TLP is the Terrestrial Limiting Point, MLP is the Marine Limiting Point. References are provided at the end of the table. Data in bold are basal SLIPs. The complete Holsea-style spreadsheet can be downloaded here: https://git…
Sample ID	Reference	Region	Site	Lat.	Long.	Corrected age (14C a BP)	Corrected age error (14C a)	Age (cal a BP)	Age 2σ Error	Dated	Type	RSL (m)	RSL 2σ error (m)	Reject
										material
BETA-211343	1	1	Lixus	35.2	-6.1	3080	40	3277	102	Organics	SLIP	0.6	0.7
BETA-211344	1	1	Lixus	35.2	-6.1	2830	40	2937	132	Organics	SLIP	-0.2	1.1
BETA-178482	1	1	Lixus	35.2	-6.1	3080	50	3301	140	Organics	SLIP	-0.1	1.1
BETA-178483	1	1	Lixus	35.2	-6.1	2470	40	2543	176	Organics	SLIP	-0.5	1.1
BETA-184132	1	1	Lixus	35.2	-6.1	5080	40	5824	94	Shells	MLP	0.8	0.7
BETA 185173	1	1	Lixus	35.2	-6.1	4740	40	5454	128	Shells	SLIP	1.3	1.6
Lv-652	2	1	Sidi Boughaba	34.3	-6.7	6651	120	7522	209	Peat	SLIP	-4.9	1
LY-2633	3	1	Moulay Bou Salham	34.2	-6.7	2577	215	2050	583	Shells	SLIP	0.7	1.2
GIF-4542	3	1	Moulay Bou Salham	34.2	-6.7	3897	111	3647	383	Shells	SLIP	0.4	1.2
L-398	4	1	Rabat	34	-6.8	816	206	856	389	Charcoal	TLP	1.7	1.2
L-38B	4	1	Rabat	34	-6.9	6377	139	6589	386	Shells	SLIP	1.1	1.5
Ly-6363	5	1	Dar Reddad Ben Ali	33.5	-7.6	3120	120	3271	306	Shells	SLIP	1.6	1.2
Ly-6364	5	1	Dar Reddad Ben Ali	33.5	-7.6	3455	50	3707	134	Shells	SLIP	1.3	1.4
Ly-6365	5	1	Dar Reddad Ben Ali	33.5	-7.6	3600	70	3918	220	Shells	SLIP	1.3	1.4
Ly-6366	5	1	Dar Reddad Ben Ali	33.5	-7.6	3510	45	3772	130	Shells	SLIP	1.3	1.4
Ly-6367	5	1	Dar Reddad Ben Ali	33.5	-7.6	3705	50	4062	167	Shells	SLIP	0.4	1.7
Ly-6368	5	1	Dar Reddad Ben Ali	33.5	-7.8	3725	50	4080	157	Shells	SLIP	1.3	0.9
Ly-2630	6	1	Oualidia	32.8	-9	3727	139	3424	439	Shells	SLIP	0.5	1.3
Ly-2631	6	1	Oualidia	32.8	-9	3737	245	3437	663	Shells	SLIP	0.2	1.3
Ly-2632	6	1	Oualidia	32.8	-9	6827	196	7045	466	Shells	SLIP	-1.1	0.9
Ly-2628	6	1	Oualidia	32.8	-9	2527	139	1944	419	Shells	SLIP	0.5	1.3
Ly-2629	6	1	Oualidia	32.8	-9	4247	139	4084	457	Shells	SLIP	0.4	1.3
Ly-2627	6	1	Oualidia	32.8	-9	5287	139	5369	417	Shells	SLIP	0.7	1.3
LZ 92-31	7	2	Lanzarote	29.2	-13.4	na	na	5265	130	Shells	SLIP	2	1.6
LZ 92-32	7	2	Lanzarote	29.2	-13.4	na	na	5630	155	Shells	SLIP	2	1.6
LZ 92-33	7	2	Lanzarote	29.1	-13.4	na	na	5815	130	Shells	SLIP	2	1.6
FV 94-30	7	2	Fuerteventura	28.7	-13.9	na	na	4400	50	Shells	SLIP	1.5	1.6
FV 94-31	7	2	Fuerteventura	28.7	-13.9	na	na	3140	50	Shells	SLIP	1.5	1.6
FV 94-33	7	2	Fuerteventura	28.7	-13.9	na	na	2740	40	Shells	SLIP	1.5	1.6
GIF 5346	8	2	Fuerteventura	28.7	-13.9	3640	100	3381	300	Shells	SLIP	2.5	1.5
FV 94-24	7	2	Fuerteventura	28.5	-13.8	na	na	2960	50	Shells	SLIP	3	1.6
GIF 9058	8	2	Fuerteventura	28.5	-13.8	4350	50	4294	219	Shells	SLIP	2.5	1.6
GIF 9060	8	2	Fuerteventura	28.5	-13.8	3960	70	3785	257	Shells	SLIP	2.5	1.6
GIF 9061	8	2	Fuerteventura	28.5	-13.8	1420	40	805	149	Shells	SLIP	1.3	0.9
FV 94-36	7	2	Fuerteventura	28.5	-13.9	na	na	820	50	Shells	SLIP	1.3	0.9
GIF 12,197	8	2	Fuerteventura	28.4	-13.9	2000	65	1411	197	Shells	SLIP	1.5	1.5
FV 94-14	7	2	Fuerteventura	28.4	-13.9	na	na	3550	50	Shells	SLIP	1.5	1.6
FV 94-13	7	2	Fuerteventura	28.4	-13.9	na	na	1510	40	Shells	SLIP	2	1.6
Ki-2336	8	2	Fuerteventura	28.2	-14.2	1140	70	559	170	Shells	SLIP	0	1.5	Rejected
Ki-2336-bis	8	2	Fuerteventura	28.2	-14.2	1940	70	1338	204	Shells	SLIP	0	1.5	Rejected
LGQ 82	8	2	Fuerteventura	28.2	-14.2	1363	151	787	310	Shells	SLIP	1.3	0.9
LGQ 83	9	2	Fuerteventura	28.2	-14.2	1204	149	617	303	Shells	SLIP	2	0.5	Rejected
GIF 7039	8	2	Fuerteventura	28.2	-14.2	1945	70	1344	204	Shells	SLIP	2.8	0.9
FV 92-3	7	2	Fuerteventura	28.2	-14.2	na	na	2085	140	Shells	SLIP	1.8	0.9
GIF-3261	10	3	Akhful	26.2	-14	4437	120	4357	420	Shells	SLIP	1.5	1.3
GIF-3260	10	3	Akhful	26.2	-14	4707	120	4692	423	Shells	SLIP	0.5	1.3
GIF-3266	10	4	Amtal	23.1	-16.1	3477	120	3109	367	Shells	SLIP	1.8	1.7
GIF-3264	10	4	Amtal	23.1	-16.1	3477	111	3105	352	Shells	SLIP	1.2	1.7
GIF-3265	10	4	Amtal	23.1	-16.1	3707	111	3411	387	Shells	SLIP	1.2	1.7
GIF-3511	10	4	Mahariat	22.5	-16.5	5447	120	5579	351	Shells	SLIP	1.5	1.3
GIF-3512	10	4	Mahariat	22.5	-16.5	5657	120	5817	349	Shells	SLIP	2.5	1.3
GIF-3515	10	4	Mahariat	22.5	-16.5	4507	120	4422	406	Shells	SLIP	0.5	1.3
GIF-3507	10	4	Lemhereis	22.2	-16.8	4757	158	4771	489	Shells	SLIP	0.5	1.3
GIF-3505	10	4	Lemhereis	22.2	-16.8	6217	129	6400	374	Shells	SLIP	-0.5	1.3
GIF-3509	10	4	Lemhereis	22.2	-16.8	6557	139	6777	391	Shells	SLIP	0.8	1.5
GIF-3514	10	4	Edjaila	21.9	-16.8	4847	1101	4709	2553	Shells	SLIP	0	1.3	Rejected
GIF-3510	10	4	Edjaila	21.9	-16.8	5257	120	5336	380	Shells	SLIP	1	1.3
GIF-3508	10	4	Edjaila	21.9	-16.8	947	93	323	269	Shells	SLIP	0	1.3
BETA-204800	11	5	Jerf el Oustani	20.4	-16.3	2720	70	2151	220	Shells	SLIP	0.6	0.7
BETA-204801	11	5	Jerf el Oustani	20.4	-16.3	2560	70	1967	235	Shells	SLIP	0.6	0.7
PA-2414	12	5	Iwik	19.9	-16.2			4980	190	na	SLIP	1.3	1
GdS-1144	12	5	Iwik	19.9	-16.2			4420	150	na	SLIP	0.6	0.7
IP3	12	5	Iwik	19.9	-16.2					na	SLIP	0.2	0.7	Rejected
NIA-292	12	5	Aghouenit	19.6	-16.3			5692	90	na	SLIP	0.1	0.7
GD-2824	13	5	Baie de Saint Jean	19.5	-16.3	4640	110	5114	321	Shells	SLIP	1.4	1.1	Rejected
GD-2827	13	5	Baie de Saint Jean	19.5	-16.3	6229	100	6855	296	Shells	SLIP	0.6	1
IP5	12	5	Aghouenit	19.5	-16.4			3200	500	na	SLIP	0.9	0.7
GD-4271	13	5	Baie de Saint Jean	19.5	-16.3	3460	70	3584	249	Shells	MLP	1.3	0.7	Rejected
GD-2826	13	5	Baie de Saint Jean	19.5	-16.3	6730	100	7371	244	Shells	SLIP	-0.5	1
NIA-291	12	5	Aghouenit	19.5	-16.4			3450	150	na	SLIP	1	0.7
IP7	12	5	Aghouenit	19.5	-16.4			1900	500	na	SLIP	0.5	0.7
PA-808	13	5	Baie de Saint Jean	19.5	-16.3	2470	80	2392	284	Shells	TLP	0.8	1	Rejected
GD-4267	13	5	Baie de Saint Jean	19.5	-16.3	2850	190	2833	495	Shells	TLP	0.1	0.9	Rejected
NIA-291	12	5	Aghouenit	19.5	-16.4			3430	70	na	SLIP	0.8	0.7
GD-2825	13	5	Baie de Saint Jean	19.5	-16.4	870	70	623	184	Shells	SLIP	0	0.9
GD-4272	13	5	Baie de Saint Jean	19.5	-16.4	3200	70	3238	253	Shells	SLIP	-0.3	0.9
GD-5311	13	5	Baie de Saint Jean	19.4	-16.4	5060	40	5564	210	Shells	SLIP	0.3	0.9
GD-4270	13	5	Baie de Saint Jean	19.4	-16.6	1760	60	1503	206	Shells	SLIP	-0.2	0.9
GD-4268	13	5	Baie de Saint Jean	19.4	-16.6	3000	70	3006	250	Shells	SLIP	0.2	1
GD-4269	13	5	Baie de Saint Jean	19.4	-16.6	4050	80	4345	302	Shells	MLP	-0.5	0.7
GD-2822	13	5	Baie de Saint Jean	19.4	-16.6	4360	80	4731	287	Shells	MLP	-0.5	0.7
GD-2823	13	5	Baie de Saint Jean	19.4	-16.6	5080	100	5599	277	Shells	MLP	-0.9	0.8	Rejected
GD-4265	13	5	Baie de Saint Jean	19.4	-16.6	4880	100	4904	318	Shells	MLP	-0.9	0.7
GD-4226	13	5	Baie de Saint Jean	19.4	-16.6	4910	110	5390	320	Shells	MLP	-1.9	0.7
Ly-351	14	5	Tenioubrar	19.1	-16.2	3086	110	2615	294	Shells	SLIP	0.2	1.2
Ly-352	14	5	Tenioubrar	19.1	-16.2	3839	120	3547	329	Shells	SLIP	1.2	1.2
na	15	5	Ndghamcha	18.4	-15.9	3477	98	3090	275	Stromatolites	MLP	-3.6	0.6
na	15	5	Ndghamcha	18.4	-15.9	4707	129	4660	368	Shells	MLP	-3.7	0.5
na	15	5	Ndghamcha	18.4	-15.9	5717	85	5844	244	Shells	MLP	-3.8	0.5
na	16	5	Ndghamcha	18.4	-15.9	6370	160	6998	385	Shells	MLP	-5.9	0.7
na	16	5	Hassei Gaboun	18.3	-15.8	4837	111	4905	349	Shells	SLIP	0	0.9
Ly-2615	17	5	Tin Oueich	18.1	-15.9	4927	139	4934	380	Shells	SLIP	1.2	1
na	16	5	Fourche, Nouakchott	18	-16	5570	120	6121	313	Shells	SLIP	1	1
GIF-2197	18	6	Boa Vista	16.1	-22.8	1107	90	514	220	Vermetids	SLIP	0.8	1
GIF-2195	18	6	Sao Vicente	16.8	-25	2447	100	1930	327	Vermetids	SLIP	2.8	1
GX31006	19	6	Santa Maria	16.6	-22.9	5940	50	6777	120	Shells	TLP	3.2	0.3
RK5	20	7	R'Kiz	16.9	-15.2	6927	111	7236	320	Shells	SLIP	0.3	1.2
RK3B	20	7	R'Kiz	16.9	-15.3	6107	102	6344	279	Shells	SLIP	0.1	0.8
RK6	20	7	R'Kiz	16.8	-15.4	5872	129	6070	322	Shells	SLIP	0	0.8
Ly-1269	20	7	Senegal Delta	16.5	-16.3	9001	245	10122	626	Peat	SLIP	-23.4	1.1
Ly-1270	20	7	Senegal Delta	16.5	-16.3	8581	225	9613	583	Peat	SLIP	-23.9	1.1
GIF-4552	21	7	Keur Marsal	16.5	-16.2	10002	186	9587	558	Peat	SLIP	-32.3	0.8	Rejected
GIF-4551	21	7	Keur Marsal	16.5	-16.2	4442	120	8992	481	Organics	MLP	-12.3	0.7	Rejected
UQ-1141	22	7	Lac de Guyers	16.4	-15.8	6507	206	6773	470	Shells	MLP	-1.3	0.7
R3	20	7	Mbodiène	16.1	-16.3	6026	255	6871	552	Peat	SLIP	-0.9	0.7
LY-1930	20	7	Ndielem	16.1	-16.4	6191	158	7054	370	Peat	SLIP	-0.5	0.6
UQ-934	22	7	Lac de Guyers	16.1	-15.9	6407	111	6661	306	Shells	MLP	-4.6	0.7
GIF-1450	20	7	Ndiasseou	16.1	-16.3	4881	139	5615	296	Peat	SLIP	0.7	0.5
I-2774	20	7	R'Kiz	16.1	-16.3	4487	129	4458	372	Shells	SLIP	-0.3	1.2	Rejected
I-2297	20	7	Aviation St.Louis	16.1	-16.4	3117	111	2729	334	Shells	SLIP	1	0.8
SacA41161	23	7	St Louis	16.1	-16.5	1870	30	1249	158	Shells	SLIP	-1.1	1.2	Rejected
SacA41162	23	7	St Louis	16.1	-16.5	1885	30	1269	162	Shells	SLIP	-2.2	1.1	Rejected
I-2296	20	7	Sor	16	-16.5	2287	111	1717	313	Shells	SLIP	1.3	0.6
GIF-4260	20	7	Rao Gandon	16	-16.5	6947	139	7236	320	Shells	SLIP	-1.6	0.6
GIF-4261	20	7	Rao Gandon	16	-16.5	6767	139	7058	337	Shells	SLIP	-0.9	0.6
LY-1345	20	7	Rao Gandon	16	-16.5	6077	245	6305	568	Shells	SLIP	-0.8	0.6	Rejected
LY-985	20	7	Rao Gandon	16	-16.5	6057	158	6280	377	Shells	SLIP	-0.4	0.6
LY-987	20	7	Rao Gandon	16	-16.5	5997	148	6228	362	Shells	SLIP	0	0.6
T-463	20	7	Rao Gandon	16	-16.5	5877	120	6078	306	Shells	SLIP	0.9	0.6
LY-983	20	7	Rao Gandon	16	-16.5	5657	129	5867	322	Shells	SLIP	0.9	0.6
MC-1562	20	7	Rao Gandon	16	-16.5	5477	129	5645	322	Shells	SLIP	1.3	0.6
LY-986	20	7	Rao Gandon	16	-16.5	5127	148	5226	379	Shells	SLIP	0.4	0.6
LY-982	20	7	Rao Gandon	16	-16.5	5077	129	5194	344	Shells	SLIP	1.3	1.2
LY-1344	20	7	Rao Gandon	16	-16.5	4627	167	4640	481	Shells	SLIP	-0.2	0.6	Rejected
MC-1563	20	7	Rao Gandon	16	-16.5	4417	120	4390	374	Shells	SLIP	0	0.6
I-2294	20	7	Rao Gandon	16	-16.5	4377	116	4328	365	Shells	SLIP	0.2	0.6
GIF-4259	20	7	Rao Gandon	16	-16.5	3837	111	3637	323	Shells	SLIP	-0.5	0.8	Rejected
LY-984	20	7	Rao Gandon	16	-16.5	3817	139	3599	389	Shells	SLIP	0.6	0.7
I-2298	20	7	Rao Gandon	16	-16.5	3657	120	3398	352	Shells	SLIP	0.5	0.8
I-2295	20	7	Rao Gandon	16	-16.5	2877	120	2433	328	Shells	SLIP	1.3	0.6
GIF-363	20	7	Ndel Gandiol	15.9	-17	2027	129	1437	320	Shells	SLIP	1.1	1.2
GIF-362	24	7	Senegal Delta	15.9	-16.5	5457	255	5615	605	Shells	TLP	2.7	0.6
GIF-364	24	7	Senegal Delta	15.9	-16.5	2197	129	1622	329	Shells	TLP	2	0.6
GIF-363	24	7	Senegal Delta	15.9	-16.5	2027	139	1442	342	Shells	SLIP	1.4	0.9
F3	20	7	Diellel	15.9	-15.9	2387	111	1840	320	Shells	SLIP	0.4	1.2
F9A	20	7	Mbeyene	15.8	-15.7	2267	129	1699	343	Shells	SLIP	0.4	0.7
UQ-935	25	7	Potou	15.8	-16.5	1800	300	1764	697	Organics	TLP	11.7	0.6
UQ-1077	25	7	Potou	15.8	-16.5	3570	100	3864	285	Organics	TLP	11.2	0.6
UQ-931	25	7	Potou	15.8	-16.5	8270	100	9243	226	Organics	TLP	9.5	0.6
F8	20	7	Naudi	15.5	-15.2	1952	129	1346	282	Shells	SLIP	0.5	1.1
UQ-1059	25	7	Lompoul	15.4	-16.7	2570	100	2605	244	Organics	TLP	2.7	0.6
UQ-989	25	7	Lompoul	15.4	-16.7	3810	100	4210	301	Organics	TLP	1.8	0.6
UQ-921	25	7	Lompoul	15.4	-16.7	12410	6003	14464	12845	Organics	TLP	-0.4	0.6	Rejected
UQ-988	25	7	Lompoul	15.4	-16.7	8570	100	9606	287	Organics	TLP	-0.6	0.6
UQ-644	25	7	Diogo	15.3	-16.8	8930	180	10015	471	Organics	TLP	-3.3	0.6
UQ-991	25	7	Diogo	15.3	-16.8	1110	50	1051	125	Organics	TLP	7.2	0.6
UQ-1094	25	7	Diogo	15.3	-16.8	3180	200	3373	499	Organics	TLP	3.8	0.6
UQ-1096	25	7	Diogo	15.3	-16.8	4060	500	4558	1303	Organics	TLP	0.8	0.6	Rejected
UQ-1175	25	7	Diogo	15.3	-16.8	700	600	863	863	Organics	TLP	-0.9	0.6
UQ-1176	25	7	Diogo	15.3	-16.8	12100	1400	14422	3728	Organics	TLP	-3.9	0.6	Rejected
N110Z-1	26	7	Offshore Fas Bouè	15.3	-16.9	4982	206	5786	487	Organics	MLP	-48.5	1.2
N110Z-2	26	7	Offshore Fas Bouè	15.3	-16.9	11142	206	13074	341	Organics	SLIP	-52.5	1.3
N110Z-3	26	7	Offshore Fas Bouè	15.3	-16.9	12002	206	14135	691	Organics	SLIP	-53	1.3
UQ-1079	25	7	Touba N'Diaye	15.2	-16.9	2650	100	2715	281	Organics	TLP	5.4	0.6
UQ-1134	25	7	Touba N'Diaye	15.2	-16.9	4510	100	5160	297	Organics	TLP	3.9	0.6
UQ-990	25	7	Touba N'Diaye	15.2	-16.9	6240	100	7155	260	Organics	TLP	1	0.6
UQ-1086	25	7	Touba N'Diaye	15.2	-16.9	6860	200	7744	411	Organics	TLP	-1.4	0.6
UQ-1284	25	7	Touba N'Diaye	15.2	-16.9	9380	300	10646	949	Organics	TLP	-2.1	0.6
UQ-1136	25	7	Touba N'Diaye	15.2	-16.9	8720	200	9778	470	Organics	TLP	-4.4	0.6
UQ-1085	25	7	Touba N'Diaye	15.2	-16.9	11480	800	13479	2235	Organics	SLIP	-5	0.7	Rejected
UQ-539	25	7	Thiaye	14.9	-17.1	4700	1230	6440	1395	Organics	SLIP	-0.2	0.7	Rejected
UQ-538	25	7	Thiaye	14.9	-17.1	5510	100	5762	431	Organics	SLIP	-0.5	0.7
UQ-619	25	7	Thiaye	14.9	-17.1	5720	635	11669	790	Organics	SLIP	-1	0.7	Rejected
UQ-617	25	7	Thiaye	14.9	-17.1	5030	170	5097	363	Organics	SLIP	-1.3	0.7	Rejected
Ly-2264	21	7	Tanma lake	14.9	-17.1	7692	264	8613	643	Organics	SLIP	-7.4	0.8
Ly-1911	21	7	Tanma lake	14.9	-17.1	5672	532	6458	1145	Organics	SLIP	-8.4	0.8	Rejected
Ly-2265	21	7	Tanma lake	14.9	-17.1	7872	196	8805	476	Organics	SLIP	-12	1
Ly-2057	21	7	Tanma lake	14.9	-17.1	7872	158	8751	374	Organics	SLIP	-15	1
Ly-2058	21	7	Tanma lake	14.9	-17.1	9632	482	11161	1430	Organics	SLIP	-17	1	Rejected
Ly-1893	21	7	Tanma lake	14.9	-17.1	10722	602	12378	1613	Organics	SLIP	-20	1	Rejected
Ly-2266	21	7	Tanma lake	14.9	-17.1	7842	245	8791	610	Organics	SLIP	-12	1
Ly-2267	21	7	Tanma lake	14.9	-17.1	7912	264	8823	617	Organics	SLIP	-19	1	Rejected
Ly-2268	21	7	Tanma lake	14.9	-17.1	1642	245	1564	560	Organics	MLP	-2	0.7
Ly-2269	21	7	Tanma lake	14.9	-17.1	7592	158	8396	373	Organics	SLIP	-12	1
GIF-2824	21	7	Offshore Dakar	14.7	-17.6	8531	186	9098	453	Peat	SLIP	-19.6	1
GIF-2825	28	7	Offshore Dakar	14.7	-17.6	8587	186	5145	2812	Shell	SLIP	-18.4	1	Rejected
GIF-2823	28	7	Offshore Dakar	14.7	-17.6	8281	186	6250	247	Peat	SLIP	-16.6	0.8	Rejected
MC-2074	28	7	Faboura	14.2	-16.8	4660	90	4658	289	Shells	SLIP	0.8	1
Gd-2895	29	7	Sangomar	14.1	-16.8	3150	100	3324	251	Shells	SLIP	0	1
Gd-2892	29	7	Sangomar	14.1	-16.8	600	50	593	64	Shells	TLP	1.8	0.5
na	29	7	Baout Tbao	14.1	-16.5	4087	77	3947	279	Shells	SLIP	-4.2	1	Rejected
Gd-2891	29	7	Bolon Maya	14	-16.5	1690	70	1084	199	Shells	SLIP	-4.8	1	Rejected
na	29	7	Djirnda	14	-16.6	5935	158	6137	382	Shells	SLIP	-0.3	1
na	30	7	Diogane	14	-16.8	1180	80	597	189	Shells	SLIP	1.2	0.7
na	29	7	Bassid	14	-16.6	3907	304	3724	791	Shells	SLIP	0.1	1
na	29	7	Bassid	14	-16.6	4037	304	3905	796	Shells	SLIP	-0.5	1
na	29	7	Bassid	14	-16.6	4557	111	4539	330	Shells	SLIP	1.8	1
na	29	7	Oudovola	13.9	-16.5	4947	77	5058	247	Shells	SLIP	-1.2	1	Rejected
na	30	7	Falia	13.9	-17	3670	100	3411	305	Shells	SLIP	0.2	1
na	29	7	Falia	13.9	-17	2397	102	1846	302	Shells	SLIP	0	1
na	29	7	M'Dimsiroh	13.9	-16.7	5517	158	5702	383	Shells	SLIP	-0.1	1
na	30	7	Niodor	13.9	-16.7	570	40	150	74	Shells	SLIP	0.3	1
na	30	7	Niodor	13.9	-16.7	170	50			Shells	SLIP	1.4	0.7	Rejected
na	30	7	Niodor	13.9	-16.7	390	70			Shells	SLIP	1	0.7	Rejected
na	30	7	Niodor	13.9	-16.7	530	70	134	134	Shells	SLIP	0.8	0.7
Gd-2893	29	7	Niodior	13.9	-16.7	1740	90	1124	226	Shells	SLIP	-0.3	1
Gd-4311	29	7	Niodior	13.9	-16.7	600	100	208	208	Shells	SLIP	0	1.2
Gd-4313	29	7	Niodior	13.9	-16.7	600	50	125	125	Shells	SLIP	0.3	1
Gd-2897	29	7	Niodior	13.9	-16.7	690	90	178	178	Shells	SLIP	0.1	1
Gd-2896	29	7	Niodor	13.9	-16.7	790	90	222	217	Shells	SLIP	0.2	1
Gd-4310	29	7	Niodor	13.9	-16.7	1020	80	454	187	Shells	SLIP	0.1	1.1
Gd-4308	29	7	Diorom	13.8	-16.5	1780	100	1157	247	Shells	SLIP	0.4	1
na	30	7	Dionewar	13.8	-16.7	2370	50	1816	210	Shells	SLIP	-1.2	1	Rejected
na	30	7	Dionewar	13.8	-16.7	2780	60	2350	253	Shells	SLIP	-1.6	1	Rejected
na	30	7	Diogane	13.8	-16.7	580	60	163	163	Shells	SLIP	0.4	0.8
na	30	7	Diogane	13.8	-16.7	400	60			Shells	SLIP	0.2	0.8	Rejected
na	29	7	Diouidiouré	13.8	-16.6	3917	77	3712	263	Shells	SLIP	0.3	1
Gd-2887	29	7	Missirah	13.7	-16.5	960	50	398	157	Shells	SLIP	0.4	1
Gd-2894	29	7	Missirah	13.7	-16.5	980	90	415	215	Shells	SLIP	0.4	1
na	29	7	Bandiala	13.7	-16.6	6477	139	6753	362	Shells	SLIP	-8.9	1.2	Rejected
na	29	7	Bandiala	13.7	-16.6	6537	139	6805	357	Shells	SLIP	-8.1	1.1	Rejected
Na	29	7	Velingara	13.7	-16.6	1917	77	1309	221	Shells	SLIP	-2.6	1	Rejected
na	29	7	Bandiala	13.7	-16.6	2357	102	1812	298	Shells	SLIP	0.3	1
Gd-5383	29	7	Diorom	13.7	-16.5	710	50	158	158	Shells	SLIP	0.7	1
Gd-2902	29	7	Djinak	13.6	-16.5	800	60	248	201	Shells	SLIP	0.2	1
Dak 62	31	7	Casamance	12.7	-16.7	3556	142	3250	396	Shells	SLIP	0.4	1
Dak 65	31	7	Casamance	12.5	-16.7	4128	152	3983	439	Shells	SLIP	0	1.1
Dak 103	31	7	Casamance	12.5	-16.7	3575	147	3276	408	Shell	SLIP	-0.1	1.1
Dak 38	31	7	Casamance	12.6	-16.7	2116	135	1533	339	Shell	MLP	-0.4	0.5	Rejected
Dak 106	31	7	Casamance	12.7	-16.4	2576	127	2639	293	Wood	SLIP	-1.3	0.7	Rejected
Dak 91	31	7	Casamance	12.7	-16.6	2561	122	2038	347	Shells	TLP	0.3	0.5
Dak 92	31	7	Casamance	12.6	-16.6	1794	113	1179	280	Shells	TLP	2.7	0.5
Dak 36	31	7	Casamance	12.6	-16.6	1539	128	936	291	Shells	TLP	2	0.5
I-3678	32	8	Offshore Guinea	9.2	-15.6	19157	353	22169	831	Coral	MLP	-107	4.2
GIF-2404	18	8	York Island	7.5	-12.5	1057	102	477	203	Vermetids	SLIP	0.5	1.8
GIF-2406	18	8	Sussex	8.3	-13.2	1147	102	558	215	Vermetids	SLIP	0.7	1.8
GIF-2405	18	8	York Island	7.5	-12.5	1827	111	1217	264	Vermetids	SLIP	2	1.8
A10	33.35	9	Offshore Abijan	5.1	-4.2	11982	255	14091	754	Peat	SLIP	-63.3	1.3
B29	33.35	9	Offshore Lahou	4.9	-5.4	10882	206	12743	549	Peat	SLIP	-62.3	1.3
C55	33.35	9	Offshore Sassandra	4.7	-6	10782	206	12605	547	Peat	SLIP	-61.3	1.3
C57	33.35	9	Offshore Sassandra	4.77	-5.9	11582	206	13544	452	Peat	SLIP	-62.3	1.3
C30	33.35	9	Offshore Lahou	4.87	-5.6	10482	206	12165	657	Peat	SLIP	-43.3	1.3
C8	33.35	9	Offshore Abijan	5	-3.9	13707	255	15634	741	Calc. algae	MLP	-100	1.1
C1	33.35	9	Offshore Abijan	5.1	-4.1	15507	264	17881	691	Calc. algae	MLP	-99	1.1
D2	33.35	9	Offshore Sassandra	4.6	-6.6	14307	264	16382	730	Calc. algae	MLP	-89	1.1
C43	33.35	9	Offshore Sassandra	4.6	-6.5	13507	255	15325	808	Calc. algae	MLP	-82	1.1
C48	33.35	9	Offshore Sassandra	4.7	-6.3	15107	264	17418	697	Calc. algae	MLP	-82	1.1	Rejected
C11	33.35	9	Offshore Assinie	4.90	-3.3	11907	206	13197	476	Calc. algae	MLP	-80	1.1
C39	33.35	9	Offshore Sassandra	4.7	-6.5	11507	206	12796	492	Calc. algae	MLP	-82	1.1
DR1	33.35	9	Offshore Abijan	5.1	-4.3	13407	255	15159	827	Calc. algae	MLP	-100	1.1
DR2	33.35	9	Offshore Abijan	5.1	-4.3	13307	255	15003	829	Calc. algae	MLP	-100	1.1
GIF-3361	34	9	Bereby	4.6	-6.9	677	93	177	177	Vermetid	SLIP	0.6	1.3
GIF-3362	34	9	Dogbale	4.6	-7	1167	69	526	225	Vermetids	SLIP	1.6	1.3
GIF-3363	34	9	Dogbale	4.6	-7	2327	102	1715	344	Vermetids	SLIP	3.1	1.3
GIF-2864	28	9	Dabou	5.3	-4.4	2427	111	1845	376	Shells	MLP	-2.5	0.7
GIF-2863	28	9	Dabou	5.3	-4.4	2377	111	1771	365	Shells	MLP	-2.5	0.7
GIF-2198	18	9	Bereby	4.6	-6.9	937	102	297	270	Vermetids	SLIP	1.1	0.9
P2Agn-l-2292	35	9	Dabou	5.1	-4.5	5072	129	5882	299	Peat	SLIP	-0.3	1.3
GIF-7420	35	9	Offshore Dabou	5.1	-4.3	8007	69	8244	267	Shells debris	MLP	-29.5	1
LRMRBx-11074	35	9	Komoe	5.1	-3.3	8127	111	9030	381	Peat	SLIP	-22.3	0.9
GIF-7414	35	9	Offshore Abijan	5.1	-4.5	8767	112	9155	368	Shell	MLP	-70	1
GIF-7415	35	9	Offshore Abijan	5.1	-4.5	9817	158	10600	510	Calc. algae	MLP	-70.5	1
LRMRBx-11074-2	35	9	Offshore Dabou	5.1	-4.4	9707	134	11092	503	Mangrove peat	SLIP	-38.3	1.2
GIF-7409	35	9	Offshore Dabou	5.1	-4.5	13307	255	15003	829	Calc. algae	MLP	-88	1.3
GIF-3674	36	9	N'Gaty	5.3	-4.3	1717	93	1047	281	Shell	SLIP	2	1.2
GIF-3672	36	9	Cap Est Niega	4.9	-6.2	1887	102	1227	304	Conglomerate	SLIP	-1	1.6
GIF-3632	36	9	Grand Bereby	4.6	-6.9	2077	111	1446	334	Shell	SLIP	2	1.6
GIF-3671	36	9	Bassa	4.6	-6.9	4197	120	4017	416	Conglomerate	SLIP	-0.5	1.6
GIF-2864	28	9	Dabou	5.3	-4.4	2427	111	1845	376	Shell	SLIP	3	0.9	Rejected
GIF-2863	28	9	Dabou	5.3	-4.4	2377	111	1771	365	Shell	SLIP	3	0.9	Rejected
GIF-3377	28	9	N'Gaty	5.3	-4.3	2357	102	1750	348	Shell	SLIP	3	0.9	Rejected
U-2196	34	9	Tiebissou	5.3	-4.4	4037	111	3827	392	Shell	TLP	4	0.7
Hv 9396	37	9	Prince's Town	4.8	-2.1	6042	129	6909	344	Peat	SLIP	-1	0.9
Hv 9397	37	9	Prince's Town	4.8	-2.1	6522	107	7381	209	Peat	SLIP	-1.4	0.9
Hv 9398	37	9	Atuabo	4.9	-2.4	4162	93	4643	219	Peat	SLIP	-6.8	0.9	Rejected
Hv 9399	37	9	Atuabo	4.9	-2.4	5657	98	6476	190	Peat	SLIP	-7.7	1	Rejected
Hv 9400	37	9	Atuabo	4.9	-2.4	82	48	141	130	Peat	TLP	0	0.9
Hv 9401	37	9	Half Assini	5.1	-2.9	691	77	633	101	wood	TLP	-2.1	0.9	Rejected
Hv 9402	37	9	New Town	5.1	-3	82	48	141	130	wood	TLP	0	0.9
Hv 9403	37	9	New Town	5.1	-3	802	69	739	168	Peat	SLIP	-0.4	0.9
N-3212	38	9	Kpone	5.7	0.1	6222	107	7110	308	Peat	SLIP	0.2	0.9
N-2982	38	9	Kpone	5.7	0	6257	93	6465	309	Shells	MLP	1.5	0.7
GIF-4241	38	9	Kpone	5.7	0	4587	148	4528	472	Shells	MLP	1.5	0.7
N-3213	38	9	Kpone	5.7	0	1816	77	1727	189	Charcoal	MLP	7	0.7
GIF-1675	18	9	Tema	5.7	0.1	2037	102	1393	316	Vermetids	SLIP	2.4	1.2
GIF-1676	18	9	Tema	5.7	0.1	2457	102	1886	359	Vermetids	SLIP	2.4	1.2
GIF-4238	38	9	Kpone	5.7	0	3107	111	2675	371	Vermetids	SLIP	1.3	1.1
GIF-4239	38	9	Kpone	5.7	0	1667	102	1000	288	Shells	TLP	7	0.7
Hv 9404	37	9	Shama	5	-1.6	6327	143	7223	331	Peat	SLIP	-1.7	0.9
Hv 9405	37	9	Shama	5	-1.6	5192	73	5967	218	Peat	SLIP	0	0.9
Hv 9406	37	9	Shama	5	-1.6	5847	125	6648	325	Peat	SLIP	-0.8	0.9
Hv 9407	37	9	Shama	5	-1.6	6157	102	7012	258	Peat	SLIP	-2	0.9
Hv 9408	37	9	Shama	5	-1.6	6602	85	7489	164	Mangrove	SLIP	-3.8	0.9
Hv 9409	37	9	Shama	5	-1.6	6837	102	7718	209	Mangrove	SLIP	-4.5	0.9
Hv 9410	37	9	Anloga	5.8	0.9	5142	162	5933	344	Mangrove	SLIP	-0.7	1
Hv 9411	37	9	Anloga	5.8	0.9	5072	81	5796	193	Peat	SLIP	-1.5	1	Rejected
Hv 9412	37	9	Keta	6	1	6327	111	7191	238	Mangrove	SLIP	-2	1
Hv 9413	37	9	Akatsi	6.1	1	5847	93	6649	237	Mangrove	SLIP	-3.2	1	Rejected
Hv 9414	37	9	Akatsi	6.1	1	7037	98	7848	170	Peat	SLIP	-5.6	1
Hv 9415	37	9	Ada	5.8	0.5	6402	111	7291	270	Peat	SLIP	-2	1
Hv 9416	37	9	Ada	5.8	0.5	6412	116	7293	272	Peat	SLIP	-2.6	1
Hv 9417	37	9	Cape Coast	5.1	-1.3	6557	235	7433	492	Mangrove	SLIP	-2.2	0.9
Hv 9418	37	9	Winneba	5.4	-0.6	2527	85	2559	197	Mangrove	SLIP	-1.3	0.9	Rejected
Hv 10334	37	9	Labadi	5.6	-0.1	2457	134	2498	346	Charcoal	TLP	4.5	0.9
Hv 10335	37	9	Labadi	5.6	-0.1	2447	63	1714	162	Mollusks	TLP	3.4	0.9
Ly 3920	39	9	Tropicana	6.2	1.4	3800	90	3521	340	Shells	SLIP	0.6	1.1
GIF-3974	28	9	Cotonou	6.3	2.4	1897	102	1234	306	Shells	SLIP	0.6	1.1
DaK-182	40	9	Cotonou	6.4	2.5	2446	120	1887	388	Shells	MLP	-0.4	0.7
GIF-2849	28	9	Cotonou	6.3	2.4	2407	111	1806	373	Shells	MLP	-7.9	1.1
GIF-2850	28	9	Cotonou	6.3	2.4	3157	111	2723	378	Shells	MLP	-10	0.8
GIF-3972	28	9	Cotonou	6.3	2.4	3607	111	3262	379	Shells	MLP	-18.2	1
DaK-198	40	9	Djegbadji	6.3	2.1	2917	129	2427	400	Shells	SLIP	0	1.4
GIF-3348	28	9	Zoumbodji	6.3	2.1	1657	102	994	288	Shells	SLIP	0.2	1.6
DaK-183	40	9	Djeffa	6.4	2.6	4307	148	4166	480	Shells	MLP	-0.4	1.2
GIF-3350	28	9	Kpodji	6.3	2.6	1527	102	885	288	Shells	SLIP	0.3	1.3	Rejected
GIF-3347	28	9	Bembe	6.5	2.5	3077	111	2645	372	Shells	SLIP	0.3	1.3	Rejected
DaK-184	40	9	Djassin	6.4	2.3	1047	111	409	283	Shells	SLIP	0.3	0.3
GIF-2847	28	9	Ahemé lake	6.6	2	5782	148	6616	321	Peat	SLIP	-1.2	0.8
GIF-2848	28	9	Porto Novo	6.6	2	5512	148	6287	344	Peat	SLIP	-2.1	0.8	Rejected
Erl4059	41	9	Yévie	6.5	2.4	2350	45	2433	252	Peat	TLP	0.2	0.7	Rejected
UtC8503	41	9	Yévie	6.5	2.4	6075	48	6973	184	Peat	SLIP	-2.1	0.8
UtC8504	41	9	Yévie	6.5	2.4	6951	46	7802	121	Peat	SLIP	-3.9	0.8
Erl4363	41	9	Porto Novo	6.4	2.7	920	44	826	91	Peat	SLIP	-0.7	0.8	Rejected
Erl4364	41	9	Porto Novo	6.4	2.7	6004	61	6833	158	Peat	SLIP	-2.3	0.8
Erl4365	41	9	Porto Novo	6.4	2.7	6688	61	7548	116	Peat	SLIP	-7	0.8	Rejected
Erl4366	41	9	Dogla Alago	6.5	2.6	2475	59	2544	179	Peat	SLIP	-1.3	0.8	Rejected
Erl4367	41	9	Dogla Alago	6.5	2.6	6093	59	6977	181	Peat	SLIP	-3.8	0.8	Rejected
Erl4061	41	9	Dogla Alago	6.5	2.6	7529	66	8304	118	Peat	SLIP	-9.4	0.8
Erl3131	42	9	Lac Sélé	7.1	2.4	6191	57	7099	155	Organics	SLIP	-2.7	0.8
Erl-4057	42	9	Lac Sélé	7.1	2.4	6972	75	7806	137	Organics	SLIP	-4	0.8
Erl-4058	42	9	Lac Sélé	7.1	2.4	7559	69	8353	165	Wood	TLP	-5.4	0.7
C39-1	43	10	Kribi Shelf	3.1	9.5	24760	360	29026	885	Organics	MLP	-122.8	1.1	Rejected
C39-2	43	10	Kribi Shelf	3.1	9.5	22770	180	26950	904	Organics	MLP	-120.9	1.1	Rejected
C39-3	43	10	Kribi Shelf	3.1	9.5	19150	130	23282	441	Organics	SLIP	-116.9	4.14	Rejected
CW-1	43	10	Campo shelf	2.4	9.3	20200	180	24295	471	Organics	MLP	-111.6	1.1
CW-2	43	10	Campo shelf	2.4	9.3	12780	150	15141	594	Organics	MLP	-110.8	1.1
CW-3	43	10	Campo shelf	2.4	9.3	5320	80	6107	172	Organics	MLP	-110.5	1.1
CW-4	43	10	Campo shelf	2.4	9.3	23180	220	27470	626	Organics	MLP	-112.4	1.1
B-84542	43.44	10	Nyong shelf	3.1	10.4	21720	520	24949	1116	Carbonate	SLIP	-100.2	5.1
B-84541	43.44	10	Nyong shelf	3.1	10.4	16550	340	19097	814	Carbonate	SLIP	-105	1.1
C17-1	43.44	10	Victoria shelf	3.9	9	11340	130	13243	247	Organics	SLIP	-60.2	1.6
C17-2	43.44	10	Victoria shelf	3.9	9	10410	228	12074	672	Organics	SLIP	-57.4	1.6
B-99373	44	10	Sanaga shelf	3.2	9.2	20140	360	24245	908	Organics	SLIP	-103.1	3.34
B-99374	44	10	Sanaga shelf	3.2	9.2	22430	240	26670	567	Organics	SLIP	-99.4	5.2
Beta-73086	45	10	Lake Issa	3.8	10	4580	50	5255	206	Organics	TLP	2.8	0.3
Beta-73087	45	10	Lake Issa	3.8	10	4770	60	5460	135	Organics	MLP	2.5	0.3
MC-2377	46	10	Libreville	0.3	9.5	6837	139	7061	368	Madrepora	MLP	-7	1
GIF-456	47	10	Ogooué	-0.4	8.9	997	107	369	278	Shells	MLP	-10	1
978	288	10	Lopez Cape	-0.7	8.7	1230	90	978	288	Shells	SLIP	1	1.2
1VT	48	11	Mayumba shelf	-3.3	10.4	6630	130	7491	226	Peat	SLIP	-34.8	1.8	Rejected
1VM	48	11	Mayumba shelf	-3.3	10.4	8380	160	9268	454	Peat	SLIP	-36.1	1.8	Rejected
41VM	48	11	Mayumba shelf	-3.6	10.8	11300	540	13233	1599	Peat	SLIP	-72.3	1.8
1VB	48	11	Mayumba shelf	-3.7	10.7	9080	170	10104	540	Peat	SLIP	-37.7	1.8
132C	48	11	Mayumba shelf	-3.8	11	6200	110	7101	306	Peat	SLIP	-15.1	1.8	Rejected
14VB	48	11	Mayumba shelf	-3.8	10.7	8930	170	10012	465	Peat	SLIP	-51.3	1.8	Rejected
14VT	48	11	Mayumba shelf	-3.8	10.7	11670	540	13907	1424	Peat	SLIP	-39.1	1.8	Rejected
28VT	48	11	Mayumba shelf	-3.8	10.8	9980	450	11506	1218	Peat	SLIP	-42.1	1.8
70VM	48	11	Mayumba shelf	-4	11	12400	210	14533	720	Peat	SLIP	-23.1	1.8	Rejected
41VT	48	11	Mayumba shelf	-4	10.8	4780	280	5508	682	Peat	SLIP	-72	1.8	Rejected
GIF-2564	52	11	Pointe Noire shelf	-4.3	11	12387	255	13830	745	Forams	MLP	-111	0.8
259C	48	11	Pointe Noire shelf	-4.4	10.7	10290	150	12010	607	Peat	SLIP	-85.1	1.8	Rejected
GIF-3451	49	11	Kouilou estuary	-4.5	11.6	626	102	533	193	Organics	MLP	-5.1	0.6
GIF-3453	49	11	Kouilou estuary	-4.5	11.6	936	102	851	196	Peaty clay	MLP	-9.6	0.6
GIF-3733	49	11	Kouilou estuary	-4.5	11.6	6656	148	7477	303	Organics	MLP	-18.1	0.6
GIF-3735	49	11	Kouilou estuary	-4.5	11.6	8826	186	9868	411	Wood	SLIP	-15.1	1.2
GIF-6884	50	11	Kouilou estuary	-4.5	11.7	7160	80	7959	208	Organics	MLP	-23.3	0.4
GIF-6883	50	11	Kouilou estuary	-4.5	11.7	4000	60	4468	311	Organics	MLP	-19.3	0.4
GIF-6181	50	11	Kouilou estuary	-4.5	11.7	450	50	427	104	Organics	MLP	-4.3	0.4
GIF-6887	50	11	Kouilou estuary	-4.5	11.7	6600	80	7436	152	Organics	MLP	-15.8	0.7
69VT	48	11	Pointe Noire shelf	-4.5	11	5450	110	6195	252	Peat	SLIP	-29.9	1.8	Rejected
69VM	48	11	Pointe Noire shelf	-4.5	11	8880	160	9891	356	Peat	SLIP	-26.1	1.8
Poz-58971	50	11	Kivesso	-4.6	11.8	2516	133	2498	350	Mud	TLP	4.3	0.1
Poz-58972	50	11	Kivesso	-4.6	11.8	387	52	403	94	Mud	TLP	0.9	0.1
Poz-58973	50	11	Kivesso	-4.6	11.8	223	68	219	219	Mud	TLP	3.5	0.1
Poz-58986	50	11	Kivesso	-4.6	11.8	7093	59	7875	134	Rods	TLP	0.9	0.1
GIF-3449	28	11	Loango	-4.6	11.8	536	69	490	167	Organics	SLIP	0.3	1.6
Poz-58970	50	11	Loango	-4.7	11.8	4710	83	5323	269	Mud	TLP	2	0.3
Poz-58968	50	11	Loango	-4.7	11.8	6846	50	7674	103	Mud	TLP	2	0.1
Poz-58969	50	11	Loango	-4.7	11.8	7205	36	8013	145	Rods	TLP	1.9	0.1
GIF-3450	28	11	Songolo	-4.8	11.9	2936	120	3061	284	Organics	SLIP	0.8	1.6
UT-4398	51	11	Songolo	-4.8	11.9	3065	40	3216	141	Organics	TLP	4.7	0.6
UT-3576	51	11	Songolo	-4.8	11.9	3960	60	4338	185	Organics	SLIP	3.7	0.7
UT-3577	51	11	Songolo	-4.8	11.9	3890	50	4255	162	Organics	SLIP	3.4	0.7
UT-3578	51	11	Songolo	-4.8	11.9	4400	50	5053	218	Organics	SLIP	2.8	0.7
UT-3579	51	11	Songolo	-4.8	11.9	4630	80	5275	298	Organics	SLIP	2.7	0.7
UT-3580	51	11	Songolo	-4.8	11.9	4930	50	5660	182	Organics	SLIP	2.3	0.7
UT-3581	51	11	Songolo	-4.8	11.9	5000	60	5742	153	Organics	SLIP	2.3	0.7
UT-3582	51	11	Songolo	-4.8	11.9	5220	50	5964	212	Organics	SLIP	1.9	0.7
UT-3583	51	11	Songolo	-4.8	11.9	6100	50	6952	204	Organics	SLIP	0.5	0.7
UT-3584	51	11	Songolo	-4.8	11.9	6630	110	7473	193	Organics	SLIP	-0.2	0.7
LGQ-276	51	11	Coraf	-4.8	11.9	940	110	813	240	Organics	TLP	0.9	0.6
LGQ-421	51	11	Coraf	-4.8	11.9	2670	140	2709	361	Organics	SLIP	0.2	0.7
LGQ-425	51	11	Coraf	-4.8	11.9	2830	120	3021	308	Organics	SLIP	0.1	0.7
na	51	11	Coraf	-4.8	11.9	3060	170	3174	396	Organics	SLIP	0.8	0.9
na	51	11	Coraf	-4.8	11.9	1590	150	1471	351	Organics	SLIP	1.2	0.9
GIF-2206	52	11	Pointe Noire shelf	-4.8	11	3876	139	4350	452	Peat	SLIP	-17.9	1.7	Rejected
GIF-2205	52	11	Pointe Noire shelf	-4.8	11	7216	186	8031	343	Peat	SLIP	-21	1.7	Rejected
GIF-2207	52	11	Pointe Noire shelf	-4.8	11	7666	186	8517	476	Peat	SLIP	-14.7	1.7	Rejected
GIF-2204	52	11	Pointe Noire shelf	-4.8	10.8	7666	186	8517	476	Peat	SLIP	-21.8	1.7	Rejected
GIF-2208	52	11	Pointe Noire shelf	-4.8	11.8	8216	196	9065	463	Peat	SLIP	-11.9	1.8
GIF-2202	52	11	Pointe Noire shelf	-4.8	10.8	8566	206	9606	572	Peat	SLIP	-29.6	1.8	Rejected
GIF-2203	52	11	Pointe Noire shelf	-4.8	10.9	8936	206	10015	485	Peat and wood	SLIP	-26	1.7
GIF-2209	52	11	Pointe Noire shelf	-4.8	12.1	5327	148	5430	430	Shells	MLP	-7.6	1.2
GIF-3230	28	12	Praia Amelia	-8.9	13.2	2027	93	1389	302	Shells	SLIP	3.5	2.6
A1	53	13	Lobito Spit	-12.4	13.5	910	40	352	169	Shells	MLP	0	0.7	Rejected
A4	53	13	Lobito Spit	-12.4	13.5	6050	40	6968	181	Coal	TLP	1.6	0.7
A5	53	13	Lobito Spit	-12.4	13.5	4230	30	4087	290	Shells	SLIP	5.1	1.7
B1	53	13	Lobito Spit	-12.4	13.5	1400	40	744	206	Shells	TLP	0	0.7	Rejected
B2	53	13	Lobito Spit	-12.4	13.5	1100	40	473	193	Shells	TLP	0	0.7	Rejected
B4	53	13	Lobito Spit-	-12.4	13.5	1850	40	1176	229	Shells	SLIP	0.6	1.7
GIF-3479	36	13	Baia Farta	-12.6	13.2	3807	111	3531	379	Shells	TLP	20	0.7
GIF-2945	54	13	Mossamedes	-15.1	12.1	3837	111	3575	380	Shells	SLIP	3.5	1.7
GIF-2946	54	13	Mossamedes	-15.1	12.1	3447	111	3084	347	Shells	SLIP	1.5	1.7
BPM1	55	14	southern Namibia	-27.5	15.4	1200	50	641	165	Shells	TLP	19	0.3	Rejected
BPM2	55	14	southern Namibia	-27.5	15.4	6010	50	6258	233	Shells	TLP	2	0.6	Rejected
BGP1	55	14	southern Namibia	-27.5	15.4	6710	60	7060	242	Shell	MLP	2.5	0.3
BGP2	55	14	southern Namibia	-27.5	15.4	6220	60	6505	225	Shell	MLP	3	0.7
Bper	55	14	southern Namibia	-27.5	15.4	7013	82	7368	212	Shell	MLP	1.5	0.7
BP3	55	14	southern Namibia	-27.5	15.4	4740	90	4843	360	Shells	SLIP	0.9	0.3
BP5	55	14	southern Namibia	-27.5	15.4	4650	70	4682	281	Shells	SLIP	1.5	0.3
BP7	55	14	southern Namibia	-27.5	15.4	4330	60	4251	290	Shells	SLIP	2	0.3
VC51-30	55	14	southern Namibia	-26	14.8	10230	100	11029	353	Shell	MLP	-61.5	2.6
26SEPT1	55	14	southern Namibia	-26.2	15	5180	70	5328	273	Shell	MLP	-1	0.8
26SEPT2	55	14	southern Namibia	-26.2	15	5060	70	5191	299	Shell	MLP	-1	0.8
26SEPT3	55	14	southern Namibia	-26.2	15	4840	50	4978	279	Shell	MLP	-1	0.8
WB4	55	14	southern Namibia	-26.3	15	6310	50	6611	234	Shell	MLP	1	0.6
SP1-87	55	15	Langebaan Lagoon	-33.2	18.1	4260	80	4712	259	Organics	SLIP	0.3	0.4
SP2-48	55	15	Langebaan Lagoon	-33.2	18.1	560	45	549	80	Organics	SLIP	-0.2	0.4
SP2-82	55	15	Langebaan Lagoon	-33.2	18.1	840	45	727	65	Organics	SLIP	-0.6	0.4
SP3-99	55	15	Langebaan Lagoon	-33.2	18.1	4850	70	5534	204	Protomella capensis	MLP	0.8	0.7	Rejected
TOP83	55	15	Langebaan Lagoon	-33.2	18.1	450	70	428	113	Organics	SLIP	-0.6	0.4
TOP159	55	15	Langebaan Lagoon	-33.2	18.1	1390	50	1236	117	Organics	SLIP	0	0.4
SL2-105	55	15	Langebaan Lagoon	-33.2	18.1	3470	60	3130	291	Shells	MLP	-0.5	0.7
SL3-48	55	15	Langebaan Lagoon	-33.2	18.1	2920	50	2465	274	Shells	MLP	-0.3	0.7
BOT126	55	15	Langebaan Lagoon	-33.2	18.1	4510	50	4479	309	Shells	MLP	-0.8	0.7
BOT176	55	15	Langebaan Lagoon	-33.2	18.1	6460	70	6692	297	Shells	MLP	-1.2	0.7
OYS	55	15	Langebaan Lagoon	-33.2	18.1	6410	45	6642	269	Shells	MLP	-0.5	0.7
Rietvlei	54	15	Rietvle	-33.8	18.5	8100	100	9020	376	Peat	TLP	-13.5	0.5
KS1	54	15	Verlorenvlei	-32.4	18.5	3640	60	3940	208	Peat	TLP	-1.3	0.6	Rejected
KS2	54	15	Verlorenvlei,	-32.4	18.5	1900	60	1800	188	Organics	TLP	-0.1	0.6
GD1	54	15	Verlorenvlei	-32.4	18.5	4340	60	5003	267	Organics	TLP	-1.9	0.6	Rejected
CC1	54	15	Verlorenvle	-32.3	18.4	7840	110	8707	279	subtidal lagoon	MLP	-4.5	0.6
CC2	54	15	Verlorenvlei	-32.3	18.4	7430	80	8209	173	subtidal lagoon	MLP	-3.5	0.6
CC3	54	15	Verlorenvlei	-32.3	18.4	5490	80	6228	219	subtidal lagoon	MLP	-1.3	0.6
References
1. Carmona, P., & Ruiz, J. M. (2009). Geomorphological evolution of the River Loukkos estuary around the Phoenician city of Lixus on the Atlantic Littoral of Morocco. Geoarchaeology: An International Journal, 24(6), 821-845.
2. Reille, M. (1978). Analyse pollinique du lac de Sidi Bou Rhaba littoral atlantique (Maroc). Ecologia Mediterranea, 4(1), 61-65.
3. Evin, J., Marechal, J., & Marien, G. (1985). Lyon natural radiocarbon measurements X. Radiocarbon, 27(2B), 386-454.
4. Gigout, M. (1959). Ages, par radiocarbonne, de deux formations des environs de Rabat (Maroc). Gauthier-Villars.
5. Lefèvre, D., Texier, J., Raynal, J. P., Occhietti, S., & Evin, J. (1994). Enregistrements-réponses des variations climatiques du Pléistocène supérieur et de l'Holocène sur le littoral de Casablanca (Maroc)/Upper Pleistocene and Holocene records on the Casablanca coast (Morocco). Quaternaire, 5(3), 173-180.
6. Ballouche, A., & Carruesco, C. (1986). Evolution holocène d’un écosystème lagunaire: la lagune de Oualidia (Maroc atlantique). Revue de géologie dynamique et de géographie physique, 27(2), 113-118.
7. Zazo, C., Goy, J. L., Hillaire-Marcel, C., Gillot, P. Y., Soler, V., González, J. Á., ... & Ghaleb, B. (2002). Raised marine sequences of Lanzarote and Fuerteventura revisited—a reappraisal of relative sea-level changes and vertical movements in the eastern Canary Islands during the Quaternary. Quaternary Science Reviews, 21(18-19), 2019-2046.
8. Meco, J., Lomoschitz, A., Rodríguez, Á., Ramos, A. J., Betancort, J. F., & Coca, J. (2018). Mid and Late Holocene sea level variations in the Canary Islands. Palaeogeography, Palaeoclimatology, Palaeoecology, 507, 214-225.
9. Onrubia Pintado, J., Meco, J., & Fontugne, M. (1997). Paleoclimatología y presencia humana holocena en Fuerteventura: Una aproximación geoarqueológica.
10. Delibrias, G., Ortlieb, L., & Petit-Maire, N. (1976). New 14C data for the Atlantic Sahara (Holocene): tentative interpretations. Journal of Human Evolution, 5(6), 535-546.
11. Barusseau, J. P., Vernet, R., Saliège, J. F., & Descamps, C. (2007). Late Holocene sedimentary forcing and human settlements in the Jerf el Oustani-Ras el Sass region (Banc d’Arguin, Mauritania). Géomorphologie: relief, processus, environnement, 13(1).
12. Certain, R., Dia, A., Aleman, N., Robin, N., Vernet, R., Barusseau, J. P., & Raynal, O. (2018). New evidence of relative sea-level stability during the post-6000 Holocene on the Banc d'Arguin (Mauritania). Marine Geology, 395, 331-345.
13. Barusseau, J. P., Bâ, M., Descamps, C., Diop, E. S., Giresse, P., & Saos, J. L. (1995). Coastal evolution in Senegal and Mauritania at 103, 102 and 101-year scales: Natural and human records. Quaternary International, 29, 61-73.
14. Evin, J., Marien, G., & Pachiaudi, C. (1975). Lyon natural radiocarbon measurements V. Radiocarbon, 17(1), 4-34.
15. Einsele, G., Herm, D., & Schwarz, H. U. (1974). Sea level fluctuation during the past 6000 yr at the coast of Mauritania. Quaternary Research, 4(3), 282-289.
16. Hébrard, L. (1978). Contribution à l’étude géologique du Quaternaire du littoral mauritanien entre Nouakchott et Nouadhibou, 18-21 latitude Nord. Participation à l’étude des désertifications du Sahara (Vol. 71, No. 1). Persée-Portail des revues scientifiques en SHS.
17. Carite, D. (1983). Éssai de synthèse du Quaternaire marin récent:(40 000 ans à l'Actuel) de Tin Oueïch (18° 4′ N-15° 49′ W, Mauritanie). Geobios, 16(3), 381-386.
18. Laborel, J., & Delibrias, G. (1976). Niveaux marins récents à Vermetidae du littoral ouest-africain. Description, datation et comparaison avec les niveaux homologues des côtes du Brésil. ASEQUA Bulletin de liaison, (47), 97-110.
19. Zazo, C., Goy, J. L., Hillaire-Marcel, C., Dabrio, C. J., González-Delgado, J. A., Cabero, A., ... & Soler, V. (2010). Sea level changes during the last and present interglacials in Sal Island (Cape Verde archipelago). Global and Planetary Change, 72(4), 302-317.
20. Faure, H., Fontes, J. C., Hébrard, L., Monteillet, J., & Pirazzoli, P. A. (1980). Geoidal change and shore-level tilt along Holocene estuaries: Senegal River area, West Africa. Science, 210(4468), 421-423.
21. Médus, J., & Monteillet, J. (1981). Données préliminaires sur la palynologie de l'holocčne du delta du fleuve Sénégal. Geobios, 14(6), 801-805.
22. Lézine, A. M. (1988). New pollen data from the Sahel, Senegal. Review of Palaeobotany and Palynology, 55(1-3), 141-154.
23. Fofana, C. A. K., Sow, E., & Lézine, A. M. (2020). The Senegal River during the last millennium. Review of Palaeobotany and Palynology, 275, 104175.
24. Délibrias, G., Guillier, M. T., & Labeyrie, J. (1969). Gif natural radiocarbon measurements III. Radiocarbon,11(2), 327-344.
25. Lézine, A. M., & Chateauneuf, J. J. (1991). Peat in the “Niayes” of Senegal: depositional environment and Holocene evolution. Journal of African Earth Sciences (and the Middle East), 12(1-2), 171-179.
26. Lezine, A. M., Turon, J. L., & Buchet, G. (1995). Pollen analyses off Senegal: evolution of the coastal palaeoenvironment during the last deglaciation. Journal of Quaternary science, 10(2), 95-105.
27. Evin, J., Marechal, J., & Marien, G. (1983). Lyon natural radiocarbon measurements IX. Radiocarbon, 25(1), 59-128.
28. Delibrias, G., Guillier, M. T., & Labeyrie, J. (1982). Gif natural radiocarbon measurements IX. Radiocarbon, 24(3), 291-343.
29. Ausseil-Badie, J., Barusseau, J. P., Descamps, C., Diop, E. S., Giresse, P., & Pazdur, M. (1991). Holocene deltaic sequence in the Saloum Estuary, Senegal. Quaternary Research, 36(2), 178-194.
30. Diara, M., & Barusseau, J. P. (2006). Late Holocene evolution of the Salum-Gambia double delta (Senegal). Geo Eco Marina, 12, 17-28.
31. Faure, M., Elouard, P., & Diop, S. (1974). Evolution de la ligne de rivage holocène en Casamance. Bull. ASEQUA, 42, 91-99.
32. McMaster, R. L., Lachance, T. P., & Ashraf, A. (1970). Continental shelf geomorphic features off portuguese guinea, guinea, and sierra leone (west africa). Marine Geology, 9(3), 203-213
33. Martin, L. (1977). Morphologie, sédimentologie et paléogéographie au Quaternaire récent du plateau continental ivoirien. Orstom.
34. Pomel, R. S. (1977). Processus épeirogéniques et eustatiques en Basse Côte-d'Ivoire depuis 5000 ans BP (étude radiométrique). Bulletin de l'Association de Géographes Français, 54(439), 51-58.
35. Tastet, J. P., Martin, L., & Aka, K. (1993). Géologie et environnements sédimentaires de la marge continentale de Côte d’Ivoire. environnement et ressources aquatiques de Côte d’Ivoire, 1, 23-61.
36. Delibrias, G., & Guillier, M. T. (1988). Gif natural radiocarbon measurements XI. Radiocarbon, 30(1), 61-124.
37. Streif, H. (1983). Die Holozäne entwicklung und geomorphologie der küstenzone von Ghana.
38. Talbot, M. R. (1981). Holocene changes in tropical wind intensity and rainfall: evidence from southeast Ghana. Quaternary Research, 16(2), 201-220.
39. Amieux, P., Bernier, P., & Dalongeville, R. (1989). Cathodoluminescence of carbonate-cemented Holocene beachrock from the Togo coastline (West Africa): an approach to early diagenesis. Sedimentary Geology, 65(3-4), 261-272.
40. Paradis, G. (1978). Interprétation paléoécologique et paléogéographique des Taphocénoses de l'Holocène récent du Sud-Bénin, a partir de la répartition actuelle des mollusques littoraux et lagunaires d'Afrique occidentale. Géobios, 11(6), 867-891.
41. Tossou, M. G., Akoègninou, A., Ballouche, A., Sowunmi, M. A., & Akpagana, K. (2008). The history of the mangrove vegetation in Bénin during the Holocene: A palynological study. Journal of African Earth Sciences, 52(4-5), 167-174.
42. Salzmann, U., & Hoelzmann, P. (2005). The Dahomey Gap: an abrupt climatically induced rain forest fragmentation in West Africa during the late Holocene. The Holocene, 15(2), 190-199.
43. Giresse, P., & Ngueutchoua, G. (1998). Variations des lignes de rivage du plateau continental du Cameroun a la fin du Pleistocene (40 ka a 10 ka BP); chronologie et environnements sedimentaires. Bulletin de la Société Géologique de France, 169(2), 315-325.
44. Ngueutchoua, G., & Giresse, P. (2010). Sand bodies and incised valleys within the Late Quaternary Sanaga–Nyong delta complex on the middle continental shelf of Cameroon. Marine and Petroleum Geology, 27(10), 2173-2188.
45. Nguetsop, V. F., Bentaleb, I., Favier, C., Bietrix, S., Martin, C., Servant-Vildary, S., & Servant, M. (2013). A late Holocene palaeoenvironmental record from Lake Tizong, northern Cameroon using diatom and carbon stable isotope analyses. Quaternary Science Reviews, 72, 49-62.
46. Weydert, P., & Rosso, R. (1981). Description et signification paléoécologique de la série holocène terminale du port à bois d'Owendo (Libreville, Gabon).
47. Delibrias, G., Guillier, M. T., & Labeyrie, J. (1971). Gif natural radiocarbon measurements VI. Radiocarbon, 13(2), 213-254.
48. Giresse, P., Malounguila-Nganga, D., & Delibrias, G. (1984). Rythmes de la transgression et de la sédimentation holocènes sur les plates-formes sous-marines du sud du Gabon et du Congo. Comptes-rendus des séances de l'Académie des sciences. Série 2, Mécanique-physique, chimie, sciences de l'univers, sciences de la terre, 299(7), 327-330.
49. Moguedet, G., Bongo-Passi, G., Giresse, P., & Schwartz, D. (1986). Corrélations entre sédiments quaternaires continentaux et marins au Congo. Revue de Géologie dynamique et de Géographie physique, 27(2), 131-40.
50. Malounguila-Nganga, D., Giresse, P., Boussafir, M., & Miyouna, T. (2017). Late Holocene swampy forest of Loango Bay (Congo). Sedimentary environments and organic matter deposition. Journal of African Earth Sciences, 134, 419-434.
51. Elenga, H., Vincens, A., Schwartz, D., Fabing, A., Bertaux, J., Wirrmann, D., ... & Servant, M. (2001). Le marais estuarien de la Songolo (Sud Congo) à l'Holocène moyen et récent. Bulletin de la Société géologique de France, 172(3), 359-366.
52. Delibrias, G., Giresse, P., & Kouyoumontzakis, G. (1973). Géochronologie des divers stades de la transgression holocène au large du Congo.
53. Dinis, P. A., Huvi, J., & Callapez, P. M. (2018). The Catumbela delta (SW Angola). Processes determining a history of changing asymmetry. Journal of African Earth Sciences, 145, 68-79.
54. Giresse, P., Kouyoumontzakis, G., & Delibrias, G. (1976). La trangression fini-holocene en Angola. Aspects chronologique, eustatique, paleoclimatique et epirogeique. Comptes Rendus de l’Academie de Sciences de Paris, 283, serie D, 1157.
55. Cooper, J. A. G., Green, A. N., & Compton, J. S. (2018). Sea-level change in southern Africa since the Last Glacial Maximum. Quaternary Science Reviews, 201, 303-318.

## Sheet: Figure 2
EIV-IGP model prediction between 28 ka and 14 ka BP
Age (BP)	RSL (m msl)	Error (m)
27237	-100.1	10.3
26670	-100.3	8.3
26520	-100.3	7.9
26370	-100.4	7.6
26220	-100.5	7.2
26070	-100.6	7
25920	-100.7	6.7
25770	-100.8	6.4
25620	-100.9	6.2
25470	-101.1	5.9
25320	-101.2	5.7
25170	-101.4	5.5
25020	-101.6	5.3
24870	-101.8	5.2
24720	-102	5.1
24570	-102.2	5.1
24420	-102.4	5.2
24270	-102.6	5.4
24120	-102.8	5.7
23970	-102.9	6
23820	-103.1	6.5
23670	-103.3	6.9
23520	-103.5	7.4
23370	-103.6	7.8
23220	-103.8	8.3
23070	-103.9	8.7
22920	-104.1	9.1
22770	-104.2	9.5
22620	-104.4	9.8
22470	-104.5	10.1
22320	-104.6	10.4
22170	-104.7	10.6
22020	-104.8	10.8
21870	-104.9	10.9
21720	-105	11
21570	-105.1	11
21420	-105.1	10.9
21270	-105.1	10.8
21120	-105.1	10.6
20970	-105.1	10.4
20820	-105.1	10.1
20670	-105	9.8
20520	-104.9	9.4
20370	-104.8	9
20220	-104.6	8.6
20070	-104.3	8.2
19920	-104	7.7
19770	-103.7	7.3
19620	-103.2	7
19470	-102.7	6.6
19320	-102.1	6.4
19170	-101.4	6.3
19020	-100.7	6.3
18870	-99.9	6.4
18720	-99	6.6
18570	-98	6.9
18420	-96.9	7.2
18270	-95.8	7.5
18120	-94.7	7.9
17970	-93.4	8.2
17820	-92.2	8.5
17670	-90.9	8.8
17520	-89.6	9
17370	-88.2	9.2
17220	-86.9	9.4
17070	-85.5	9.5
16920	-84.2	9.5
16770	-82.8	9.5
16620	-81.5	9.4
16470	-80.1	9.3
16320	-78.8	9.2
16170	-77.5	9
16020	-76.2	8.7
15870	-75	8.4
15720	-73.8	8
15570	-72.6	7.6
15420	-71.5	7.2
15270	-70.5	6.7
15120	-69.5	6.2
14970	-68.6	5.7
14820	-67.8	5.1
14670	-67	4.6
14520	-66.3	4
14370	-65.7	3.5
14220	-65.2	3
14070	-64.7	2.6
13920	-64.3	2.2
13770	-63.9	1.9
13620	-63.5	1.7
13470	-63.2	1.6
13320	-62.9	1.5
13170	-62.5	1.5
13020	-62.1	1.5
12870	-61.7	1.5
12720	-61.3	1.6
12570	-60.8	1.7
12420	-60.3	1.9
12270	-59.8	2.2
12120	-59.3	2.6
11402	-57.1	5.7

## Sheet: Figure 3
Figure 3b,d,f: Relative Sea Level (RSL) position and rates of changes during the main phase of deglaciation.
Region 7			Region 9			Region 11			Barbados
Age BP	Rate (mm/y)	Rate Error	Age BP	Rate (mm/y)	Rate Error	Age BP	Rate (mm/y)	Rate Error	Age BP	Rate (mm/y)	Rate Error
14825	-0.51	5.42	13995	-3.1	13.1	14844	9	8.1	13647	8.4	4.5
14135	0.69	4.05	13544	-4.7	11.4	13297	13.1	4.2	13497	8.7	4
13985	1.09	3.72	13394	-3.7	10.1	13147	13.4	3.8	13347	8.8	3.6
13835	1.54	3.4	13244	-1.2	8.4	12997	13.7	3.4	13197	8.8	3.3
13685	2.04	3.11	13094	2.9	6.5	12847	14	3.1	13047	8.8	3.2
13535	2.57	2.88	12944	8.5	5.3	12697	14.2	2.8	12897	8.7	3.1
13385	3.15	2.72	12794	14.7	6.5	12547	14.4	2.5	12747	8.6	3.1
13235	3.74	2.65	12644	20.3	9.1	12397	14.6	2.3	12597	8.5	3.2
13085	4.35	2.66	12494	24.1	11.2	12247	14.7	2.1	12447	8.6	3.4
12935	4.97	2.73	12344	25.2	11.6	12097	14.8	1.9	12297	8.8	3.6
12785	5.57	2.85	12194	23.4	10.1	11947	14.8	1.8	12147	9.3	3.8
12635	6.16	2.97	12044	19.5	7.5	11797	14.8	1.7	11997	10	3.7
12485	6.71	3.06	11894	14.5	5.7	11647	14.8	1.6	11847	10.8	3.2
12335	7.22	3.1	11744	9.7	6.1	11497	14.8	1.6	11697	11.8	2.6
12185	7.68	3.07	11594	5.9	7.7	11347	14.7	1.6	11547	12.8	2.5
12035	8.09	2.97	11444	3.6	9.2	11197	14.6	1.6	11397	13.7	2.9
11885	8.44	2.81	11294	2.8	10.2	11047	14.5	1.6	11247	14.4	3.7
11735	8.74	2.6	11144	3.1	10.7	10897	14.4	1.6	11097	14.8	4.1
11585	8.99	2.37	10994	4.3	10.9	10747	14.2	1.6	10947	14.9	4.2
11435	9.19	2.15	10844	5.8	10.7	10597	14	1.6	10797	14.6	4.1
11285	9.34	2.01	10694	7.4	10.3	10447	13.8	1.7	10647	14.1	3.9
11135	9.45	2.02	10544	8.7	9.8	10297	13.5	1.7	10497	13.3	3.6
10985	9.54	2.18	10394	9.7	9.4	10147	13.2	1.8	10347	12.4	3.5
10835	9.6	2.46	10244	10.4	9.1	9997	12.9	1.8	10197	11.3	3.3
10685	9.66	2.78	10094	10.9	8.9	9847	12.6	1.8	10047	10.2	3.2
10535	9.71	3.07	9944	11.2	8.7	9697	12.2	1.8	9897	9.1	3.4
10385	9.77	3.26	9794	11.4	8.5	9547	11.7	1.8	9747	7.9	3.8
10235	9.84	3.33	9644	11.5	8.4	9397	11.3	1.7	9597	6.7	4.3
10085	9.92	3.26	9494	11.6	8.5	9247	10.8	1.6	9447	5.6	4.9
9935	10.02	3.03	9344	11.6	8.7	9097	10.3	1.5	9297	4.5	5.6
9785	10.13	2.68	9194	11.7	9.1	8947	9.8	1.3	9147	3.5	6.3
9635	10.23	2.24	9044	11.7	9.5	8797	9.3	1.2	8997	2.7	6.9
9485	10.3	1.81	8894	11.7	9.6	8647	8.7	1.1	8847	2	7.4
9335	10.35	1.49	8744	11.7	9.5	8497	8.2	1
9185	10.34	1.4	8594	11.6	9	8347	7.6	1
9035	10.26	1.5	8444	11.3	7.8	8197	7.1	1.1
8885	10.09	1.66	8294	10.8	6.2	8047	6.5	1.2
8735	9.83	1.75	8144	10	4.6	7897	6	1.3
8585	9.48	1.75	7994	9	3.7	7747	5.5	1.4
8435	9.04	1.63	7844	7.7	3.2	7597	4.9	1.4
8285	8.51	1.43	7694	6.2	2.7	7447	4.5	1.5
8135	7.92	1.2	7544	4.7	2.3	7297	4	1.4
7985	7.28	0.99	7394	3.4	2.2	7147	3.5	1.4
7835	6.6	0.86	7244	2.2	2.4	6997	3.1	1.3
7685	5.9	0.88	7094	1.4	2.5	6847	2.7	1.2
7535	5.2	0.99	6944	1.1	2.6	6697	2.4	1.2
7385	4.51	1.1	6794	1.2	3	6547	2	1.1
7235	3.85	1.19	6644	1.5	3.4	6397	1.7	1
7085	3.23	1.22	6494	1.5	3.3	6247	1.4	1
6935	2.67	1.19	6344	1.4	2.8	6097	1.2	1
6785	2.16	1.11	6194	1.1	3.3	5947	0.9	1
6635	1.71	1.01	6044	0.8	5.1	5797	0.7	1
6485	1.32	0.9	5894	0.4	6.8	5647	0.4	1
6335	1	0.83	5744	0.1	8	5497	0.2	1.1
6185	0.73	0.81	5594	-0.2	8.5	5347	0.1	1.1
6035	0.5	0.84	5444	-0.3	8.3	5197	-0.1	1.1
5885	0.31	0.87	5294	-0.4	7.7	5047	-0.3	1
5735	0.16	0.89	5144	-0.3	6.9	4897	-0.4	1
5585	0.04	0.88	4994	-0.3	6.5	4747	-0.6	0.9
5435	-0.07	0.82	4844	-0.2	6.7	4597	-0.7	0.8
5285	-0.15	0.75	4694	-0.1	7.2	4447	-0.8	0.8
5135	-0.21	0.69	4544	0.2	7.7	4297	-0.9	0.8
4985	-0.25	0.66	4394	0.4	8.1	4147	-1	0.8
4835	-0.28	0.67	4244	0.7	8.1	3997	-1.1	0.9
4685	-0.28	0.72	4094	1	7.6	3847	-1.1	0.9
4535	-0.26	0.77	3944	1.3	7	3697	-1.2	1
4385	-0.21	0.8	3794	1.5	6.5	3547	-1.2	1.1
4235	-0.16	0.8	3644	1.4	6.1	3397	-1.1	1.1
4085	-0.08	0.8	3494	1.2	5.7	3247	-1.1	1.1
3935	0	0.79	3344	0.9	5	3097	-1	1.1
3785	0.09	0.78	3194	0.6	4.2	2947	-1	1.1
3635	0.17	0.8	3044	0.3	4.2	2797	-0.9	1.1
3485	0.25	0.81	2894	0.2	4.8	2647	-0.8	1.1
3335	0.31	0.83	2744	0.3	5.4	2497	-0.7	1.1
3185	0.36	0.81	2594	0.8	5.4	2347	-0.6	1.1
3035	0.38	0.78	2444	1.4	4.8	2197	-0.5	1.1
2885	0.38	0.74	2294	1.9	4.2	2047	-0.4	1.2
2735	0.36	0.71	2144	2	3.9	1897	-0.3	1.2
2585	0.32	0.7	1994	1.5	4.1	1747	-0.3	1.2
2435	0.27	0.72	1844	0.6	4.2	1597	-0.2	1.2
2285	0.21	0.77	1694	-0.6	4	1447	-0.1	1.1
2135	0.15	0.82	1544	-1.6	3.9	1297	-0.1	1.1
1985	0.09	0.86	1394	-2.3	3.9	1147	0	1.2
1835	0.03	0.87	1244	-2.4	3.8	997	0	1.2
1685	-0.03	0.87	1094	-2.1	3.6	847	0	1.4
1535	-0.09	0.85	944	-1.5	3.4	697	0	1.6
1385	-0.15	0.82	794	-0.9	3.3	547	0.1	1.8
1235	-0.21	0.78	644	-0.4	3.4	397	0.1	2.1
1085	-0.26	0.74	494	-0.2	3.5	247	0.1	2.4
935	-0.32	0.72	344	-0.3	3.7	97	0.1	2.7
785	-0.39	0.75	194	-0.6	4.4
635	-0.45	0.86	44	-0.9	5.9

## Sheet: Figure 4
Probabilities of RSL highstand > 1 m
Region	Age BP	RSL estimate	RSL error	(RSL > 1 m) %	Region	Age BP	RSL estimate	RSL error	(RSL > 1 m) %	Region	Age BP	RSL estimate	RSL error	(RSL > 1 m) %	Region	Age BP	RSL estimate	RSL error	(RSL > 1 m) %	Region	Age BP	RSL estimate	RSL error	(RSL > 1 m) %	Region	Age BP	RSL estimate	RSL error	(RSL > 1 m) %	Region	Age BP	RSL estimate	RSL error	(RSL > 1 m) %	Region	Age BP	RSL estimate	RSL error	(RSL > 1 m) %	Region	Age BP	RSL estimate	RSL error	(RSL > 1 m) %	Region	Age BP	RSL estimate	RSL error	(RSL > 1 m) %
1	7729	-4.6	2.4	0	2	5945	1.9	2.4	76.3	3	5115	0.7	3.5	45.2	4	7168	0.5	3.5	36.1	5	7614	-0.5	2.3	10.1	6	2257	3	2.9	91.7	7	8035	-6.2	1.3	0	8	1481	2.1	3.1	77.4	9	8091	-7	1.3	0	10	1264	1	3.3	48.4
1	7521	-3.8	1.8	0	2	5815	1.9	2.2	78.3	3	4692	0.9	2.2	49.8	4	6777	0.6	2.4	35.5	5	7370.5	-0.3	1.8	8.3	6	1930	2.7	2.1	94.1	7	7935	-5.4	1.3	0	8	1217	1.8	2.4	76.8	9	7991	-6	1.1	0	10	977	0.8	2.5	44.3
1	7421	-3.4	1.6	0	2	5715	1.9	2	79.4	3	4592	1	2	50.2	4	6677	0.6	2.2	36.5	5	7270.5	-0.2	1.7	7.9	6	1830	2.5	2.1	93.8	7	7835	-4.7	1.3	0	8	1167	1.7	2.3	75.3	9	7891	-5.1	0.9	0	10	927	0.8	2.3	43.7
1	7321	-3	1.5	0	2	5615	1.9	1.9	82.6	3	4492	1.1	2	53.6	4	6577	0.7	2	36.9	5	7170.5	-0.1	1.6	8.1	6	1730	2.4	2.1	91.1	7	7735	-4.1	1.3	0	8	1117	1.6	2.2	74.3	9	7791	-4.3	0.8	0	10	877	0.8	2.2	42.4
1	7221	-2.5	1.4	0	2	5515	1.9	1.8	84.1	3	4392	1.1	2.1	55	4	6477	0.7	1.8	38	5	7070.5	0	1.5	9	6	1630	2.3	2.1	88.6	7	7635	-3.5	1.3	0	8	1067	1.6	2.1	72.3	9	7691	-3.7	0.8	0	10	827	0.7	2.2	39.9
1	7121	-2.1	1.4	0	2	5415	1.9	1.7	85.4	3	4292	1.2	2.2	56.6	4	6377	0.8	1.7	40.7	5	6970.5	0.1	1.4	9.9	6	1530	2.2	2.2	86.2	7	7535	-3	1.2	0	8	1017	1.5	2	70.7	9	7591	-3.2	0.8	0	10	777	0.7	2.1	38.4
1	7021	-1.7	1.4	0	2	5315	1.9	1.7	85.2	3	4192	1.2	2.4	57.6	4	6277	0.9	1.7	43.2	5	6870.5	0.2	1.4	11.8	6	1430	2	2.2	83.6	7	7435	-2.5	1.1	0	8	967	1.4	1.9	68.5	9	7491	-2.8	0.8	0	10	727	0.7	2	36.9
1	6921	-1.4	1.4	0.3	2	5215	1.9	1.7	85	3	4092	1.3	2.7	58.1	4	6177	0.9	1.6	45.8	5	6770.5	0.3	1.3	14.4	6	1330	1.9	2.2	80.9	7	7335	-2	1.1	0	8	917	1.3	1.8	65.6	9	7391	-2.4	0.8	0	10	677	0.6	1.9	34.4
1	6821	-1	1.5	0.5	2	5115	1.9	1.6	85.4	3	3992	1.3	3	58.6	4	6077	1	1.6	48.2	5	6670.5	0.4	1.3	16.9	6	1230	1.8	2.2	76.5	7	7235	-1.7	1	0	8	867	1.3	1.7	62.8	9	7291	-2.2	0.7	0	10	627	0.6	1.9	32.7
1	6721	-0.7	1.5	1.6	2	5015	1.9	1.6	86.6	3	3892	1.3	3.3	57.4	4	5977	1	1.6	50.4	5	6570.5	0.4	1.3	19	6	1130	1.6	2.2	72	7	7135	-1.3	0.9	0	8	817	1.2	1.7	59.6	9	7191	-1.9	0.7	0	10	577	0.6	1.8	29.7
1	6621	-0.4	1.6	4.3	2	4915	1.9	1.6	87.5	3	3792	1.3	3.7	56.7	4	5877	1.1	1.5	52.4	5	6470.5	0.5	1.3	21.4	6	1030	1.5	2.2	67.1	7	7035	-1	0.8	0	8	767	1.1	1.6	56.3	9	7091	-1.7	0.7	0	10	527	0.5	1.7	27.8
1	6521	-0.1	1.7	8	2	4815	1.9	1.6	88.4	3	3692	1.3	4	56.6	4	5777	1.1	1.5	53.8	5	6370.5	0.6	1.3	24.1	6	930	1.3	2.1	62	7	6935	-0.7	0.7	0	8	717	1	1.6	52.3	9	6991	-1.6	0.7	0	10	477	0.5	1.7	25.1
1	6421	0.1	1.8	13.2	2	4715	1.9	1.6	88.4	3	3592	1.4	4.3	56.8	4	5677	1.1	1.5	54.7	5	6270.5	0.6	1.3	27.5	6	830	1.2	2	58	7	6835	-0.5	0.7	0	8	667	0.9	1.5	48	9	6891	-1.5	0.8	0	10	427	0.4	1.6	23.1
1	6321	0.3	1.8	19.9	2	4615	2	1.6	88.9	3	3492	1.4	4.6	55.7	4	5577	1.1	1.4	55.4	5	6170.5	0.7	1.3	30.5	6	730	1	1.9	51.6	7	6735	-0.3	0.6	0	8	617	0.9	1.5	43.7	9	6791	-1.4	0.9	0	10	377	0.4	1.6	20.6
1	6221	0.4	1.9	26.8	2	4515	2	1.5	89.2	3	3392	1.4	4.9	56	4	5477	1.1	1.4	54.5	5	6070.5	0.7	1.2	31.5	6	630	0.9	1.7	43.4	7	6635	-0.1	0.6	0	8	567	0.8	1.4	37.8	9	6691	-1.2	1	0	10	327	0.3	1.5	18.2
1	6121	0.6	2	31.5	2	4415	2	1.5	89.7	3	3292	1.4	5.1	56.2	4	5377	1.1	1.4	53.9	5	5970.5	0.7	1.2	32.7	6	530	0.7	1.6	36.5	7	6535	0	0.6	0	8	517	0.7	1.4	32.6	9	6591	-1.1	1.1	0	10	277	0.3	1.5	15.8
1	6021	0.7	2	35.7	2	4315	2	1.5	90.3	3	3192	1.3	5.4	55.6	4	5277	1.1	1.4	52.8	5	5870.5	0.7	1.2	33.5	6	430	0.6	1.4	28	7	6435	0.1	0.6	0.1	8	467	0.6	1.3	27.5	9	6491	-1	1.3	0	10	227	0.3	1.5	13.5
1	5921	0.8	2	39.1	2	4215	2	1.5	91.1	3	3092	1.3	5.6	55.1	4	5177	1	1.5	51.3	5	5770.5	0.8	1.2	34.7	6	330	0.5	1.3	20.8	7	6335	0.2	0.6	0.4	8	417	0.6	1.3	22.8	9	6391	-0.9	1.4	0.2	10	177	0.2	1.4	12.1
1	5821	0.8	2	43.2	2	4115	2	1.4	91.2	3	2992	1.3	5.8	55	4	5077	1	1.5	49	5	5670.5	0.8	1.2	34.7	6	230	0.3	1.3	13.8	7	6235	0.3	0.6	0.8	8	367	0.5	1.3	18.9	9	6291	-0.7	1.5	0.6	10	127	0.2	1.4	11.5
1	5721	0.9	2	46.6	2	4015	2	1.4	92.2	3	2892	1.3	6	54.7	4	4977	1	1.5	47.1	5	5570.5	0.8	1.2	35.4	6	130	0.2	1.3	10.3	7	6135	0.4	0.6	1	8	317	0.4	1.2	16.1	9	6191	-0.6	1.5	0.7	10	77	0.1	1.5	10.8
1	5621	0.9	1.9	47.9	2	3915	2.1	1.4	92.4	3	2792	1.3	6.2	53.6	4	4877	0.9	1.5	46.4	5	5470.5	0.8	1.2	36.4	6	30	0.1	1.3	9	7	6035	0.4	0.6	1.9	8	267	0.3	1.2	13.1	9	6091	-0.5	1.3	0.7	10	27	0.1	1.5	10.5
1	5521	1	1.9	50	2	3815	2.1	1.4	92.2	3	2692	1.3	6.3	53	4	4777	0.9	1.5	45.7	5	5370.5	0.8	1.1	39.5	6	-50	0	1.5	8.9	7	5935	0.5	0.6	3	8	217	0.3	1.2	11	9	5991	-0.5	1.2	0.6	10	-50	0	1.6	10.9
1	5421	1	1.9	51.7	2	3715	2.1	1.3	92.8	3	2592	1.2	6.5	51.8	4	4677	0.9	1.5	45.3	5	5270.5	0.9	1.1	41.2						7	5835	0.5	0.6	4.7	8	167	0.2	1.2	9.6	9	5891	-0.4	1.3	1.4
1	5321	1	1.9	52.7	2	3615	2.1	1.3	94.3	3	2492	1.2	6.6	50.1	4	4577	0.9	1.6	44.4	5	5170.5	0.9	1	41						7	5735	0.6	0.6	5.4	8	117	0.1	1.3	8.4	9	5791	-0.4	1.7	4.8
1	5221	1.1	1.8	54.6	2	3515	2.1	1.3	95	3	2392	1.2	6.7	49.8	4	4477	0.8	1.6	43.9	5	5070.5	0.9	1	41.9						7	5635	0.6	0.6	7.9	8	67	0.1	1.3	7.5	9	5691	-0.4	2.2	10.9
1	5121	1.1	1.8	55.5	2	3415	2.1	1.3	95.6	3	2292	1.1	6.7	49.9	4	4377	0.8	1.7	43.8	5	4970.5	0.9	1	42						7	5535	0.6	0.6	8.8	8	17	0	1.4	7.2	9	5591	-0.4	2.9	16.7
1	5021	1.1	1.8	57	2	3315	2.1	1.2	95.5	3	2192	1.1	6.8	49.5	4	4277	0.9	1.7	45	5	4870.5	0.9	1	41.4						7	5435	0.6	0.6	9.7	8	-50	-0.1	1.5	7.3	9	5491	-0.4	3.5	21
1	4921	1.1	1.8	57	2	3215	2.1	1.2	95.8	3	2092	1.1	6.8	49.4	4	4177	0.9	1.8	46.9	5	4770.5	0.9	1	40.7						7	5335	0.6	0.7	10.3						9	5391	-0.4	4.1	24.7
1	4821	1.1	1.7	58.4	2	3115	2.1	1.2	95.7	3	1992	1	6.8	49	4	4077	0.9	1.9	48.3	5	4670.5	0.9	1	39.5						7	5235	0.6	0.7	10.7						9	5291	-0.4	4.6	27.1
1	4721	1.1	1.6	57.9	2	3015	2.1	1.2	95.8	3	1892	1	6.7	48.8	4	3977	0.9	1.9	50.1	5	4570.5	0.9	1	37.9						7	5135	0.6	0.7	10.4						9	5191	-0.5	5.1	27.5
1	4621	1.1	1.6	57.6	2	2915	2.1	1.2	96.1	3	1792	1	6.6	47.6	4	3877	1	1.9	52.5	5	4470.5	0.9	1	36.4						7	5035	0.6	0.7	10						9	5091	-0.5	5.4	27.6
1	4521	1.1	1.5	57	2	2815	2.1	1.3	95.6	3	1692	0.9	6.5	46.9	4	3777	1	1.9	54.4	5	4370.5	0.9	1	35.5						7	4935	0.5	0.7	9.4						9	4991	-0.5	5.5	28
1	4421	1.1	1.3	55.3	2	2715	2.1	1.3	94.4	3	1592	0.9	6.4	46.2	4	3677	1.1	1.9	56	5	4270.5	0.9	1	34.3						7	4835	0.5	0.7	8.8						9	4891	-0.5	5.5	27.7
1	4321	1	1.2	53.9	2	2615	2.1	1.3	93.9	3	1492	0.8	6.2	45.7	4	3577	1.1	1.8	58.1	5	4170.5	0.8	1	33.1						7	4735	0.5	0.7	8						9	4791	-0.5	5.4	27.3
1	4221	1	1.1	51.9	2	2515	2.1	1.3	93.4	3	1392	0.8	6	45.4	4	3477	1.2	1.8	59.1	5	4070.5	0.8	1	32.5						7	4635	0.5	0.7	6.1						9	4691	-0.5	5.2	27.6
1	4121	1	1	47.3	2	2415	2	1.3	93.1	3	1292	0.7	5.8	44.7	4	3377	1.2	1.8	61.8	5	3970.5	0.8	1	31.4						7	4535	0.4	0.7	4.9						9	4591	-0.5	4.9	26.8
1	4021	0.9	0.9	44.1	2	2315	2	1.3	93	3	1192	0.7	5.6	43.8	4	3277	1.2	1.8	61.9	5	3870.5	0.8	1	29.4						7	4435	0.4	0.7	4.1						9	4491	-0.4	4.5	26
1	3921	0.9	0.9	40.8	2	2215	2	1.3	93.2	3	1092	0.6	5.3	43.2	4	3177	1.3	1.8	62.6	5	3770.5	0.8	0.9	27.1						7	4335	0.4	0.7	3.2						9	4391	-0.4	4	25.3
1	3821	0.8	0.9	35.4	2	2115	2	1.3	94.2	3	992	0.5	5	41.6	4	3077	1.3	1.9	63	5	3670.5	0.8	0.8	24.1						7	4235	0.3	0.7	3.1						9	4291	-0.3	3.6	22.9
1	3721	0.8	0.8	27.9	2	2015	2	1.2	94.5	3	892	0.5	4.6	39.9	4	2977	1.3	2	62.4	5	3570.5	0.7	0.7	20.6						7	4135	0.3	0.7	2.9						9	4191	-0.2	3.1	20.8
1	3621	0.7	0.8	21.7	2	1915	2	1.2	95.9	3	792	0.4	4.2	37.7	4	2877	1.3	2.1	62	5	3470.5	0.7	0.7	18						7	4035	0.3	0.7	2.9						9	4091	-0.1	2.7	21.4
1	3521	0.6	0.8	15.3	2	1815	2	1.2	96.5	3	692	0.4	3.9	34.8	4	2777	1.3	2.3	61.8	5	3370.5	0.7	0.7	15.4						7	3935	0.3	0.7	3						9	3991	0.1	2.4	22.4
1	3421	0.5	0.8	9.5	2	1715	2	1.1	97	3	592	0.3	3.5	32.5	4	2677	1.3	2.5	59.8	5	3270.5	0.6	0.7	12.8						7	3835	0.3	0.7	3.4						9	3891	0.2	2.2	24.9
1	3321	0.5	0.8	6.7	2	1615	2	1.1	97	3	492	0.3	3	30.4	4	2577	1.3	2.7	57.8	5	3170.5	0.6	0.7	11.5						7	3735	0.3	0.7	3.2						9	3791	0.3	2.1	26.8
1	3221	0.4	0.8	4.8	2	1515	1.9	1	97.1	3	392	0.2	2.6	26.5	4	2477	1.3	2.9	57.4	5	3070.5	0.6	0.7	10.2						7	3635	0.3	0.7	2.9						9	3691	0.5	1.9	29.8
1	3121	0.3	0.9	4.4	2	1415	1.9	1	96.4	3	292	0.2	2.2	22.4	4	2377	1.2	3.1	56.3	5	2970.5	0.5	0.8	9.4						7	3535	0.4	0.7	3.8						9	3591	0.6	1.8	32.4
1	3021	0.3	0.9	3.8	2	1315	1.8	1	95.1	3	192	0.1	1.8	16.6	4	2277	1.2	3.3	55.5	5	2870.5	0.5	0.8	9						7	3435	0.4	0.7	4.4						9	3491	0.6	1.9	36.6
1	2921	0.2	1	4.9	2	1215	1.7	1	94.1	3	92	0.1	1.6	10.9	4	2177	1.2	3.5	54.2	5	2770.5	0.5	0.9	9.3						7	3335	0.4	0.7	5.4						9	3391	0.7	2.1	38.6
1	2821	0.2	1.1	6.4	2	1115	1.6	0.9	92	3	-50	0	1.5	9.3	4	2077	1.1	3.6	52.8	5	2670.5	0.4	1	9.2						7	3235	0.5	0.8	8.7						9	3291	0.7	2.3	40.4
1	2721	0.2	1.1	7.2	2	1015	1.5	0.9	88.7						4	1977	1.1	3.7	50.8	5	2570.5	0.4	1	9.7						7	3135	0.5	0.8	11.3						9	3191	0.7	2.4	41.3
1	2621	0.1	1.2	8.3	2	915	1.4	0.9	82.1						4	1877	1	3.8	49.6	5	2470.5	0.4	1	9.8						7	3035	0.6	0.8	13.1						9	3091	0.7	2.4	39.2
1	2521	0.1	1.2	8.3	2	815	1.3	0.9	73.7						4	1777	1	3.9	48.6	5	2370.5	0.4	1	9.7						7	2935	0.6	0.8	15.8						9	2991	0.6	2.3	35.6
1	2421	0.1	1.3	8.7	2	715	1.1	0.9	64.2						4	1677	0.9	3.9	46.8	5	2270.5	0.4	1	9.2						7	2835	0.6	0.8	18.3						9	2891	0.5	2.1	31.9
1	2321	0.2	1.3	10.2	2	615	1	0.9	51.2						4	1577	0.9	3.9	44.6	5	2170.5	0.4	1	8.8						7	2735	0.7	0.8	20.3						9	2791	0.5	1.8	28.7
1	2221	0.2	1.3	11.2	2	515	0.9	0.9	39						4	1477	0.8	3.8	43.1	5	2070.5	0.3	1	8.2						7	2635	0.7	0.8	22.2						9	2691	0.5	1.5	23.8
1	2121	0.2	1.4	11.9	2	415	0.7	1	27.9						4	1377	0.8	3.8	41.6	5	1970.5	0.3	1	7.7						7	2535	0.7	0.8	23.8						9	2591	0.4	1.4	20
1	2021	0.2	1.5	12.9	2	315	0.6	1	19						4	1277	0.7	3.7	40.1	5	1870.5	0.3	0.9	6.5						7	2435	0.8	0.8	25.8						9	2491	0.4	1.3	19.5
1	1921	0.2	1.6	15.2	2	215	0.4	1	12.9						4	1177	0.6	3.5	38.3	5	1770.5	0.3	1	5.9						7	2335	0.8	0.8	26.8						9	2391	0.6	1.5	28.6
1	1821	0.2	1.7	16.7	2	115	0.3	1.1	9.7						4	1077	0.6	3.4	36.9	5	1670.5	0.2	1	6						7	2235	0.8	0.8	26.8						9	2291	0.8	1.7	42
1	1721	0.2	1.9	19.9	2	15	0.1	1.2	8.1						4	977	0.5	3.2	36	5	1570.5	0.2	1	6.1						7	2135	0.8	0.8	27.9						9	2191	1.1	1.8	55.2
1	1621	0.3	2	21.9	2	-50	0	1.3	6.4						4	877	0.4	3	34.1	5	1470.5	0.2	1.1	6.8						7	2035	0.8	0.8	28.8						9	2091	1.4	1.9	67.9
1	1521	0.3	2.2	23.5											4	777	0.4	2.8	31.5	5	1370.5	0.1	1.1	6.5						7	1935	0.8	0.7	27.4						9	1991	1.7	1.8	77.8
1	1421	0.3	2.4	25											4	677	0.3	2.5	29.1	5	1270.5	0.1	1.2	6.4						7	1835	0.8	0.7	25.9						9	1891	2	1.7	86.4
1	1321	0.3	2.5	26											4	577	0.3	2.3	24.6	5	1170.5	0.1	1.2	6.7						7	1735	0.8	0.7	24.5						9	1791	2.1	1.6	90.7
1	1221	0.3	2.6	26.3											4	477	0.2	2	19.8	5	1070.5	0.1	1.2	6.4						7	1635	0.8	0.7	24.1						9	1691	2.2	1.6	92.9
1	1121	0.3	2.7	26.7											4	377	0.2	1.7	15	5	970.5	0	1.2	5.6						7	1535	0.7	0.7	24.3						9	1591	2.1	1.4	93.6
1	1021	0.3	2.7	26.6											4	277	0.1	1.5	10.8	5	870.5	0	1.2	5.6						7	1435	0.7	0.7	21.9						9	1491	1.9	1.3	92.9
1	921	0.3	2.7	26.4											4	177	0.1	1.3	8.3	5	770.5	0	1.2	4.9						7	1335	0.7	0.7	19.7						9	1391	1.7	1.2	89.2
1	821	0.2	2.7	25.3											4	77	0	1.3	6.3	5	670.5	0	1.2	4.3						7	1235	0.7	0.7	17.6						9	1291	1.4	1.1	75.4
1	721	0.2	2.5	23.8											4	-50	-0.1	1.4	6.3	5	570.5	0	1.1	3.9						7	1135	0.6	0.7	16.4						9	1191	1.1	1.2	59.8
1	621	0.2	2.4	22.4																5	470.5	0	1.1	2.7						7	1035	0.6	0.7	14.7						9	1091	0.9	1.3	47.2
1	521	0.2	2.2	19.7																5	370.5	0	1	2.6						7	935	0.6	0.7	14						9	991	0.7	1.4	37
1	421	0.1	1.9	15.9																5	270.5	0	1	2.2						7	835	0.6	0.8	12.7						9	891	0.6	1.4	29.3
1	321	0.1	1.7	12.7																5	170.5	0	1	2						7	735	0.5	0.7	10.4						9	791	0.5	1.3	25.1
1	221	0.1	1.5	9.7																5	70.5	0	1	2.3						7	635	0.5	0.7	9.1						9	691	0.6	1.3	24.1
1	121	0.1	1.3	7.2																5	-50	0	1.1	4						7	535	0.5	0.7	5.9						9	591	0.7	1.4	29.5
1	21	0	1.2	5.2																										7	435	0.4	0.7	3.5						9	491	0.7	1.4	32.6
1	-50	0	1.3	6.7																										7	335	0.4	0.6	2.7						9	391	0.7	1.3	31.5
																														7	235	0.3	0.7	2.3						9	291	0.6	1.1	20.5
																														7	135	0.3	0.7	2.3						9	191	0.4	0.9	7.6
																														7	35	0.2	0.8	3.4						9	91	0.2	0.9	2.9
																														7	-50	0.2	1	5.2						9	-50	-0.1	1.3	5.7
[truncated: 25 more columns]
